# Supplementary material
Source: publisher figshare collection journal article supplement (https://sage.figshare.com/ndownloader/files/15964412)
Supplement: Supplementary file 1 [file 15964412]

# Supporting information

## Pyridine-bridged bifunctional organocatalysts for the synthesis of cyclic carbonates from carbon dioxide

Quan-Yao Liu, Lei Shi, Ning Liu<sup>\*</sup>

School of Chemistry and Chemical Engineering, Key Laboratory for Green

Processing of Chemical Engineering of Xinjiang Bingtuan, Shihezi University, North

Fourth Road, Shihezi, Xinjiang 832003, People's Republic of China

<sup>\*</sup>Corresponding Author: Ning Liu: ningleu@163.com; ningliu@shzu.edu.cn

Totals - 26 pages, and 50 figures

1. NMR Spectra for the Organocatalysts **1a-1l**.....S2-S13
2. NMR Spectra for the Cycloaddition Products.....S14-S29



## 2. NMR Spectra for the Organocatalysts

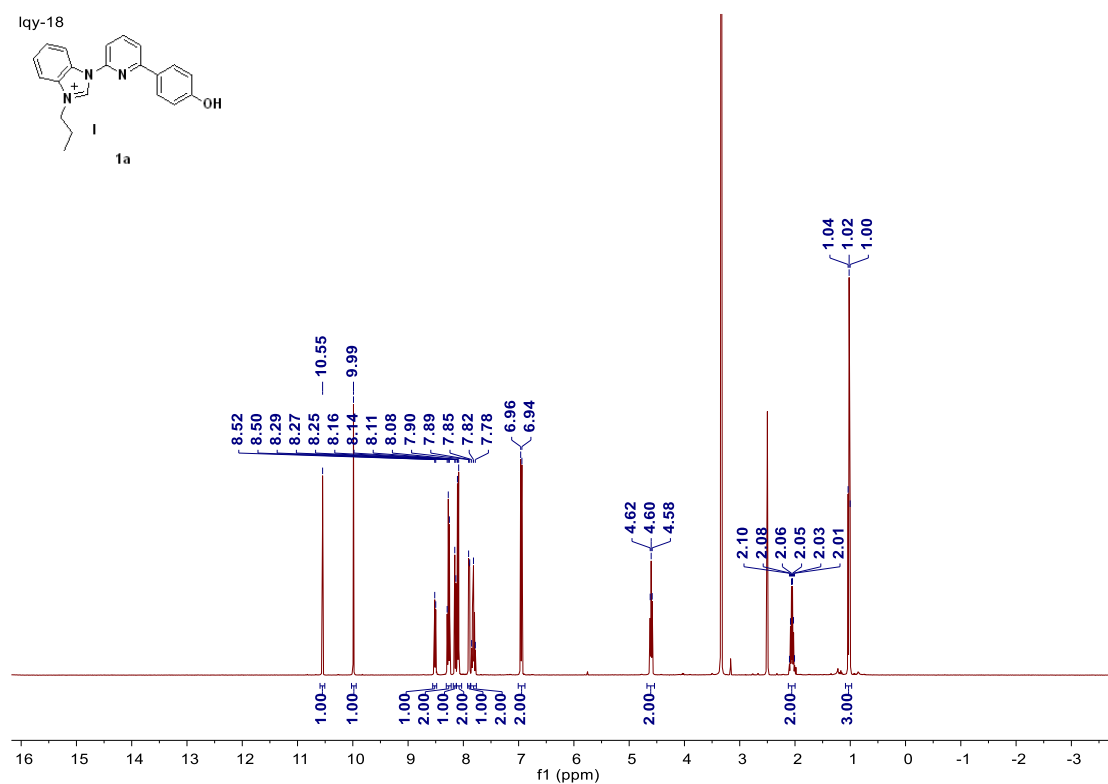

**Figure S1.**  $^1\text{H}$  NMR spectra of organocatalyst **1a**.

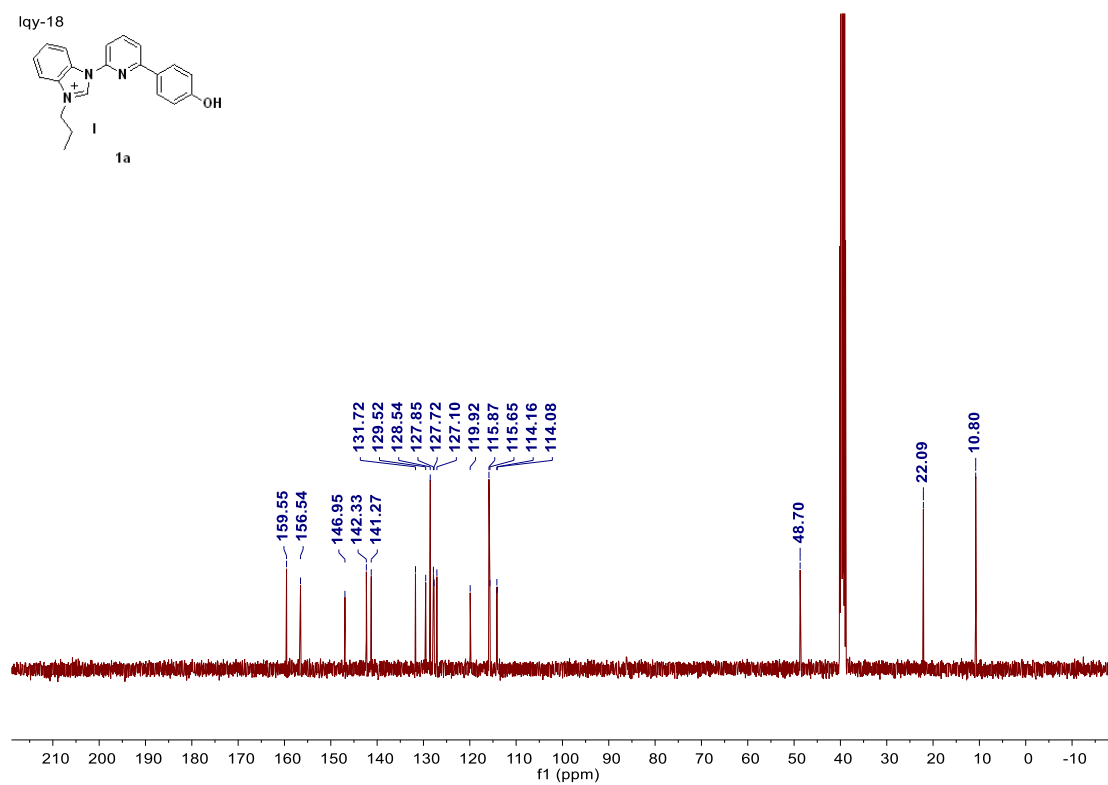

**Figure S2.**  $^{13}\text{C}$  NMR spectra of organocatalyst **1a**.



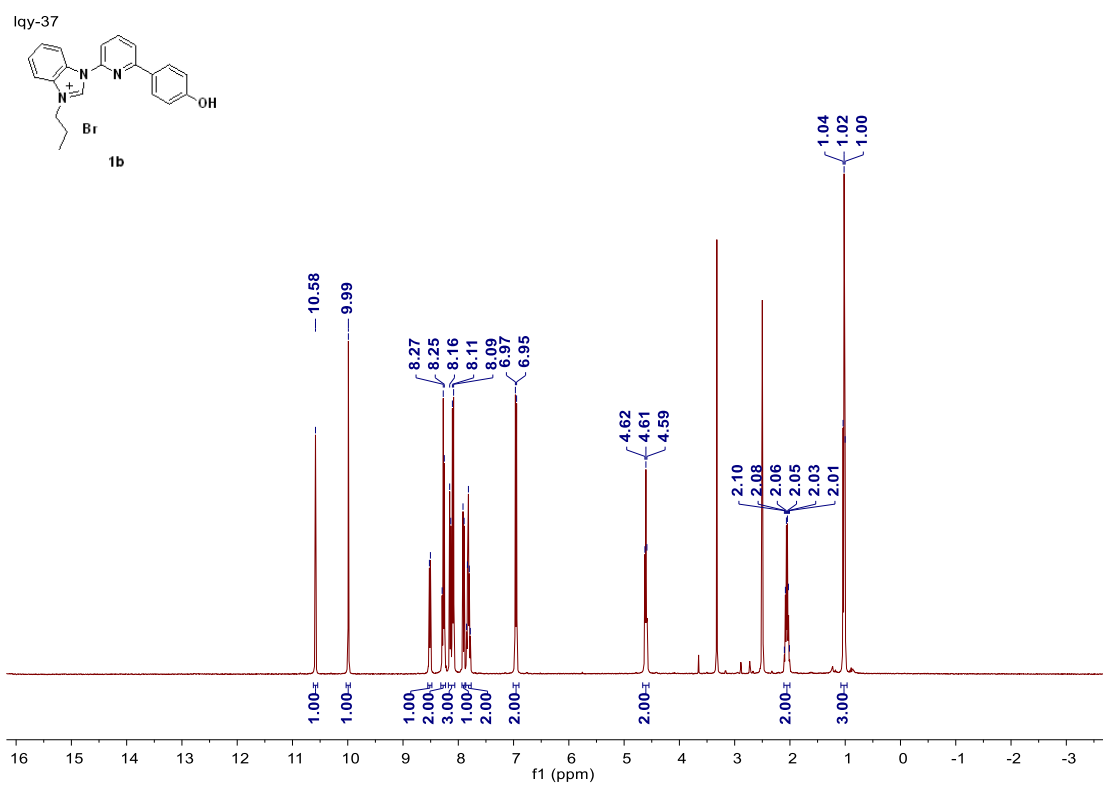

**Figure S3.** <sup>1</sup>H NMR spectra of organocatalyst **1b**.

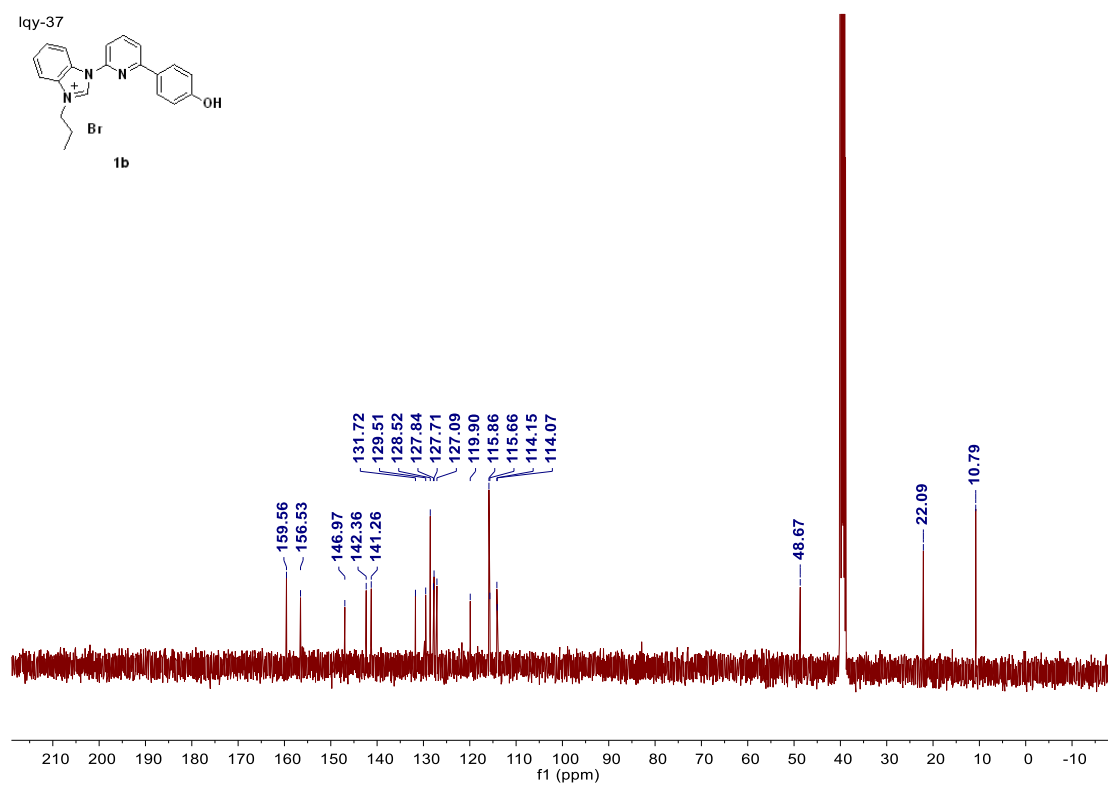

**Figure S4.** <sup>13</sup>C NMR spectra of organocatalyst **1b**.



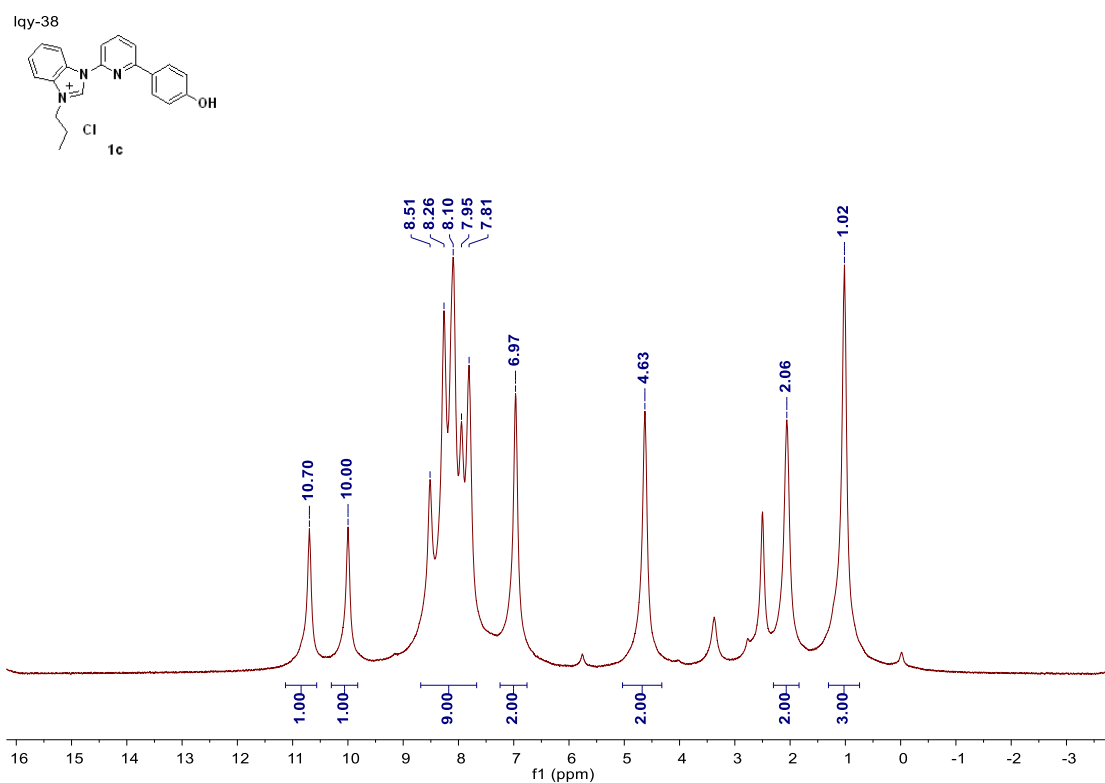

**Figure S5.** <sup>1</sup>H NMR spectra of organocatalyst **1c**.

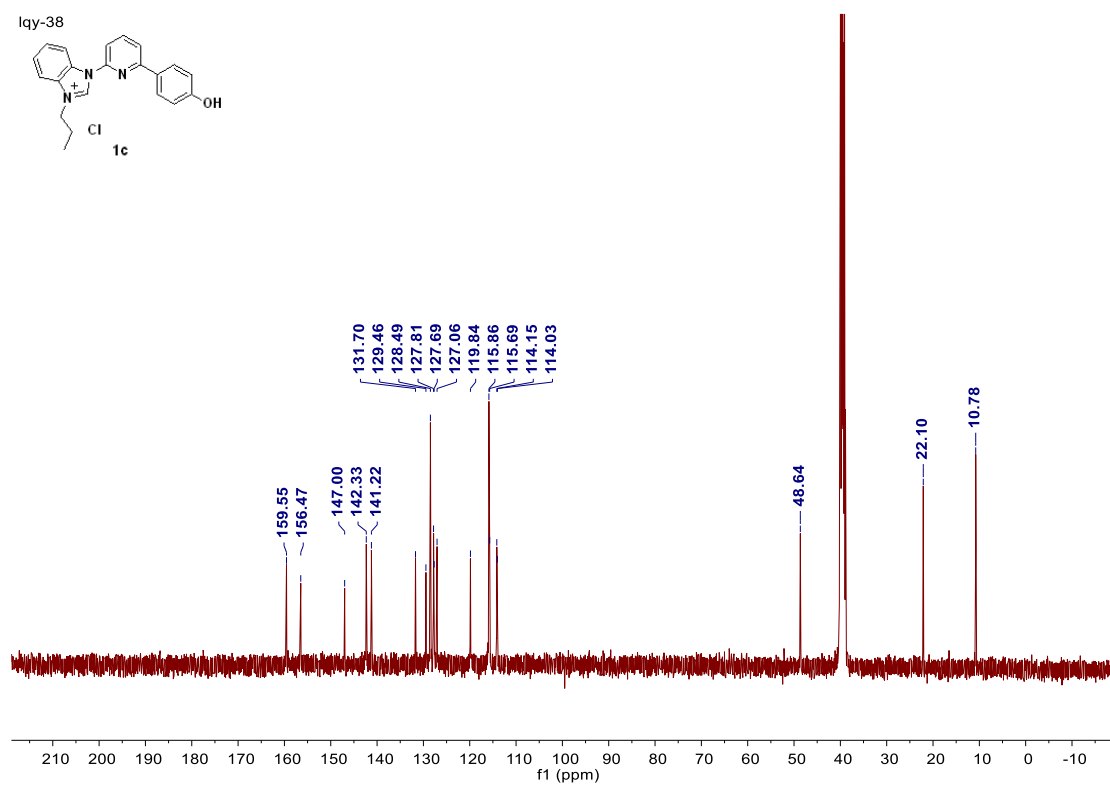

**Figure S6.** <sup>13</sup>C NMR spectra of organocatalyst **1c**.



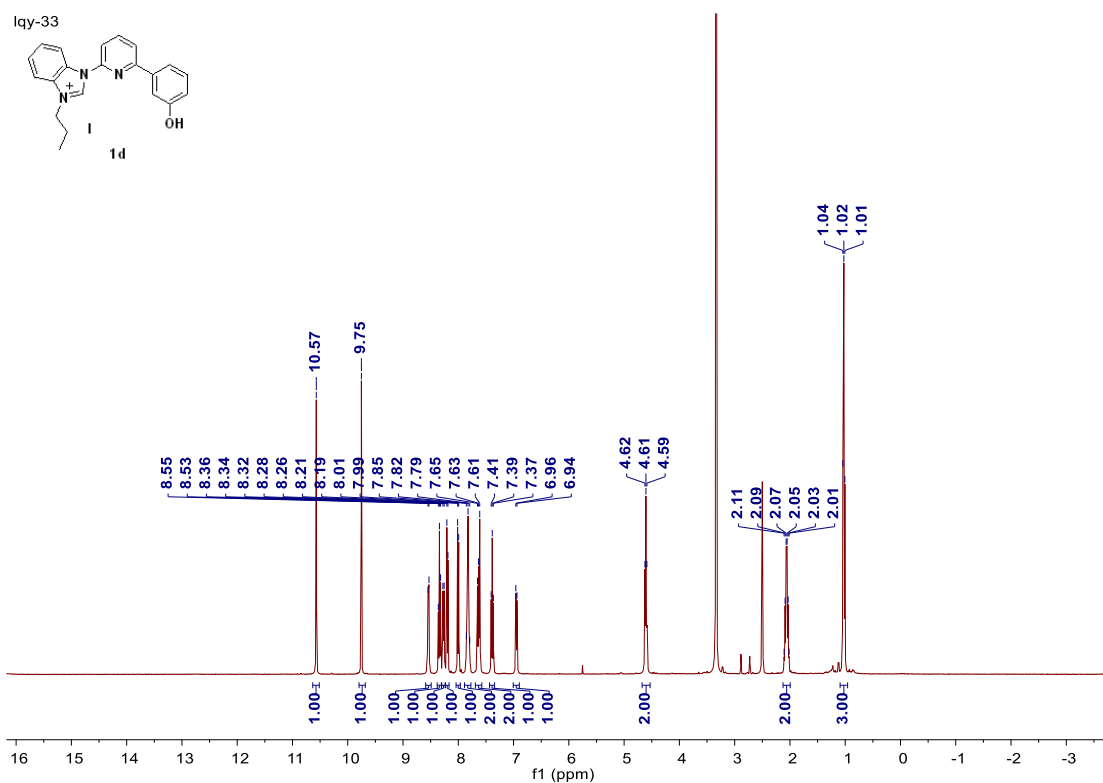

**Figure S7.** <sup>1</sup>H NMR spectra of organocatalyst **1d**.

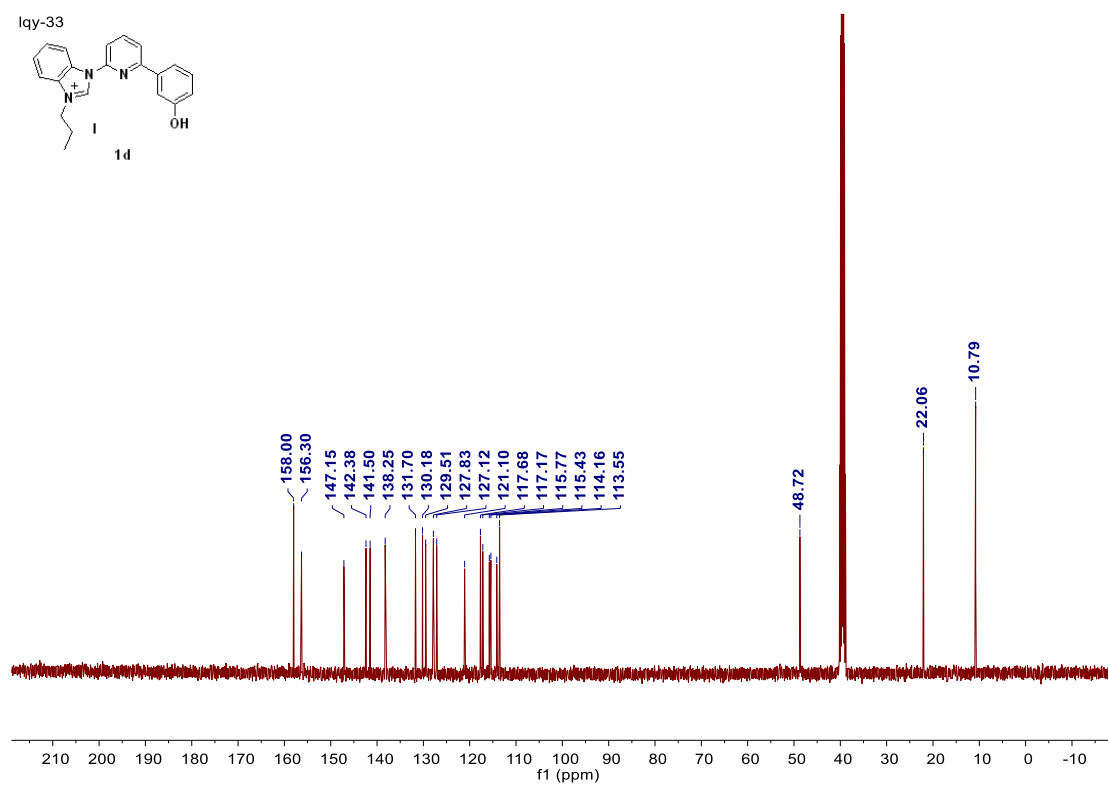

**Figure S8.** <sup>13</sup>C NMR spectra of organocatalyst **1d**.







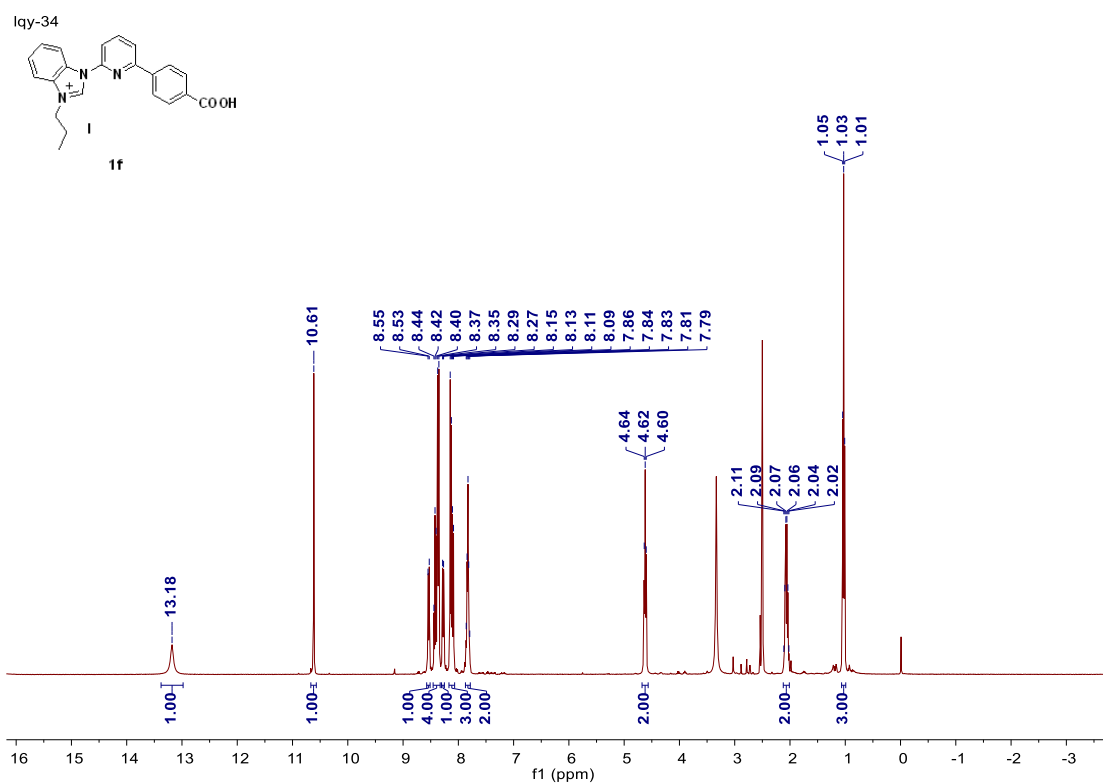

**Figure S11.**  $^1\text{H}$  NMR spectra of organocatalyst **1f**.

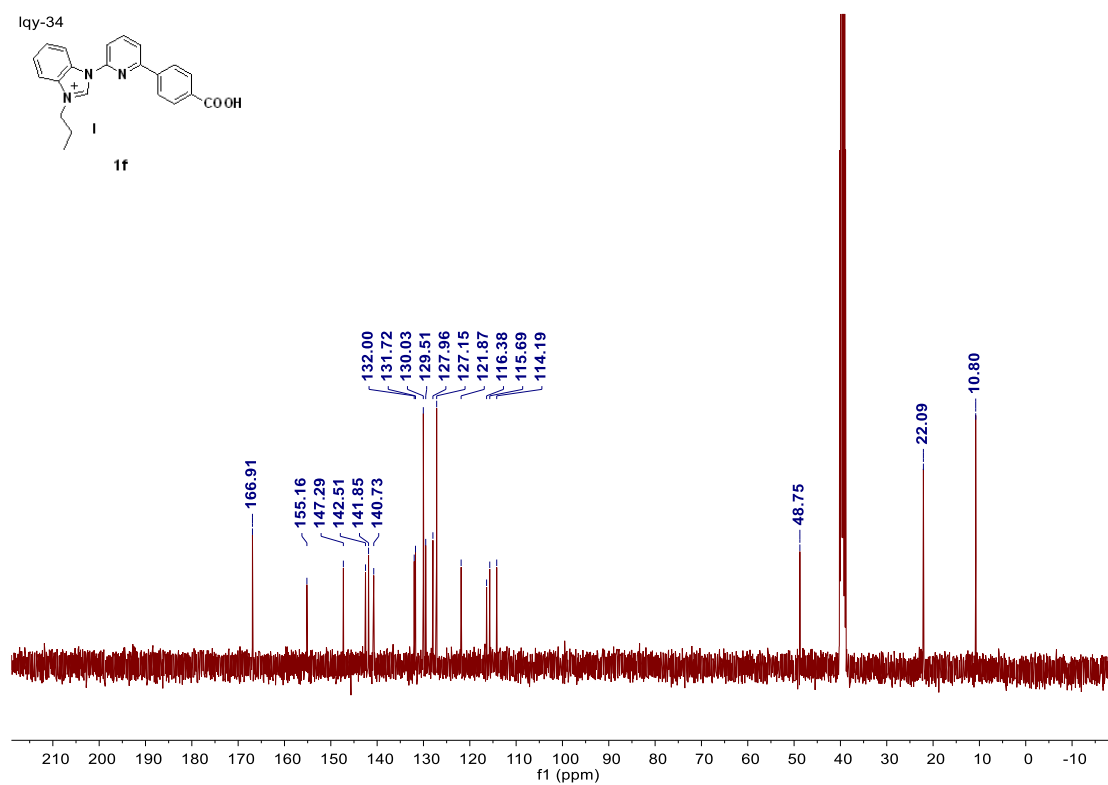

**Figure S12.**  $^{13}\text{C}$  NMR spectra of organocatalyst **1f**.



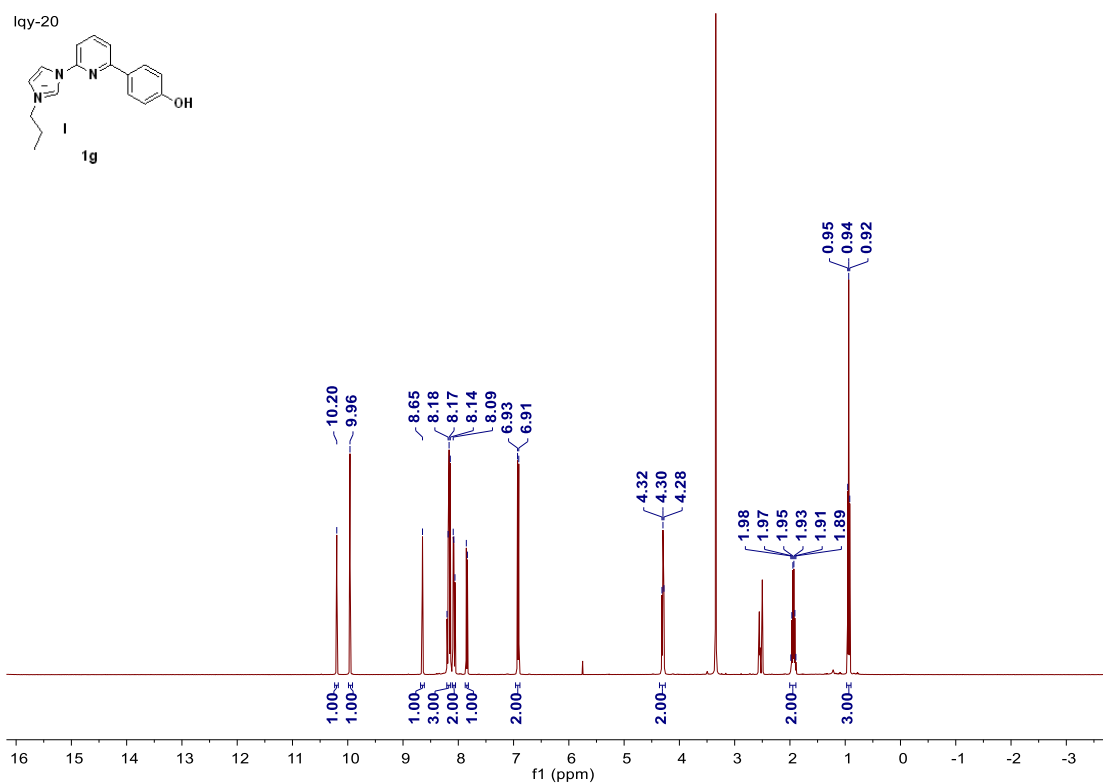

**Figure S13.** <sup>1</sup>H NMR spectra of organocatalyst **1g**.

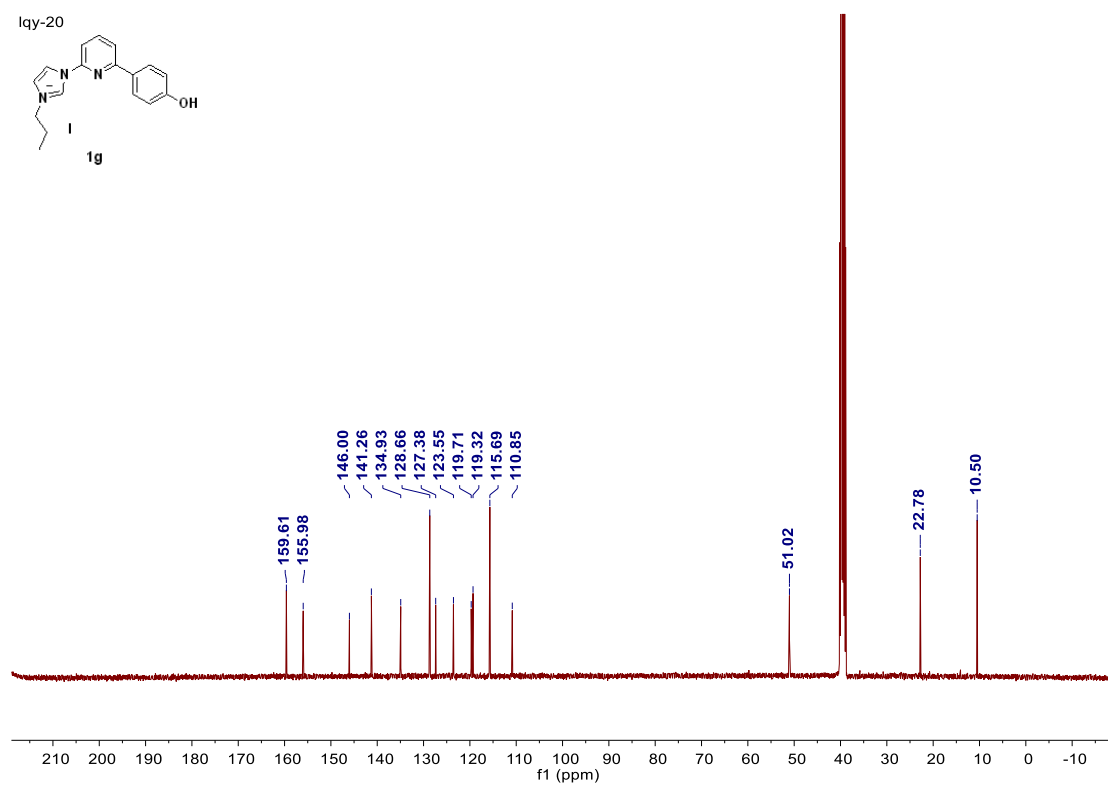

**Figure S14.** <sup>13</sup>C NMR spectra of organocatalyst **1g**.



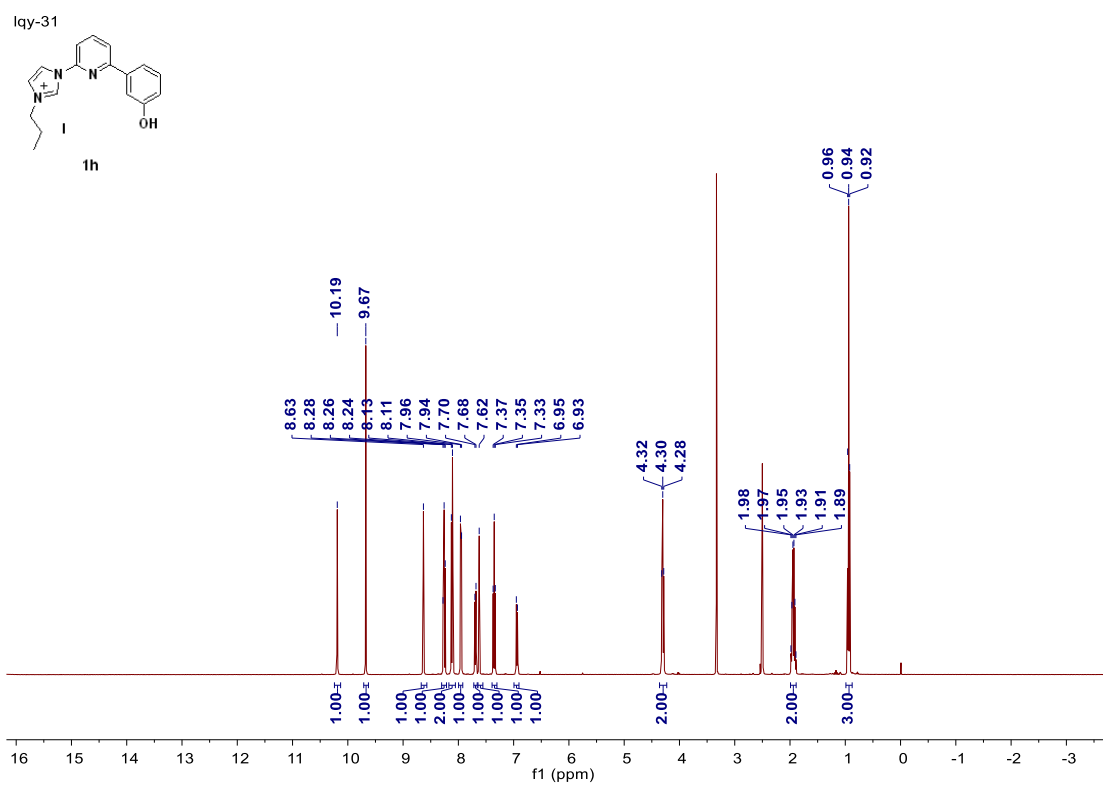

**Figure S15.** <sup>1</sup>H NMR spectra of organocatalyst **1h**.

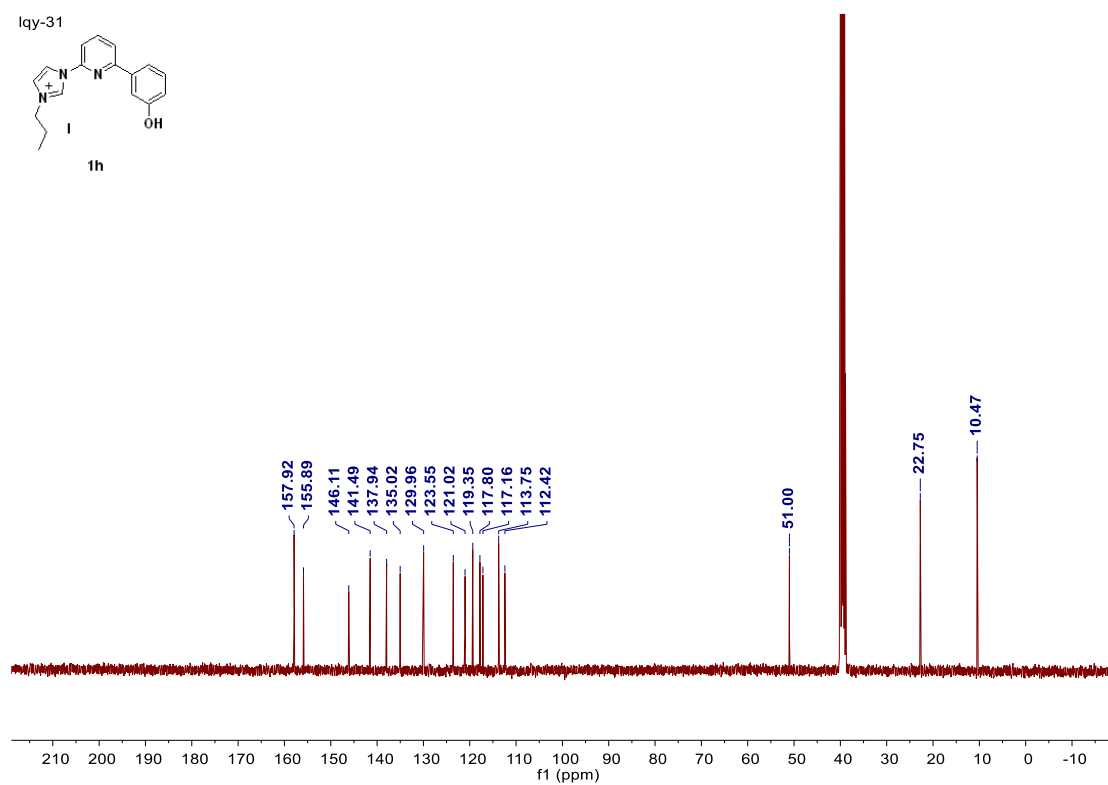

**Figure S16.** <sup>13</sup>C NMR spectra of organocatalyst **1h**.



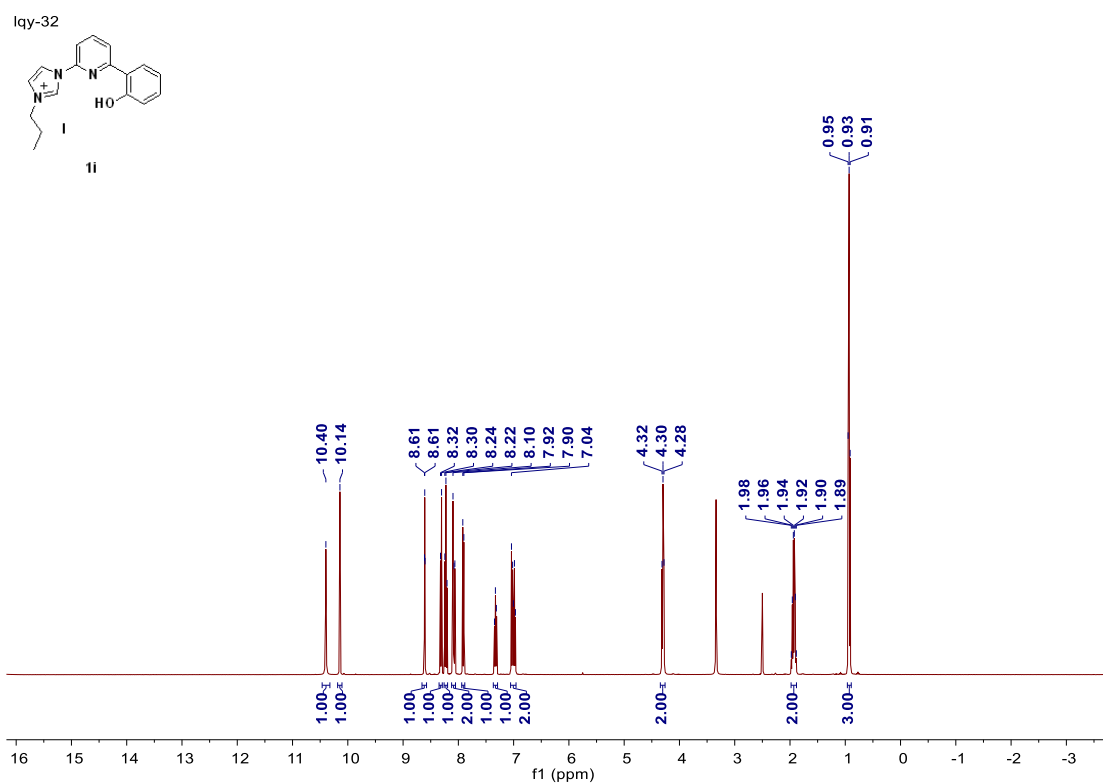

**Figure S17.** <sup>1</sup>H NMR spectra of organocatalyst **1i**.

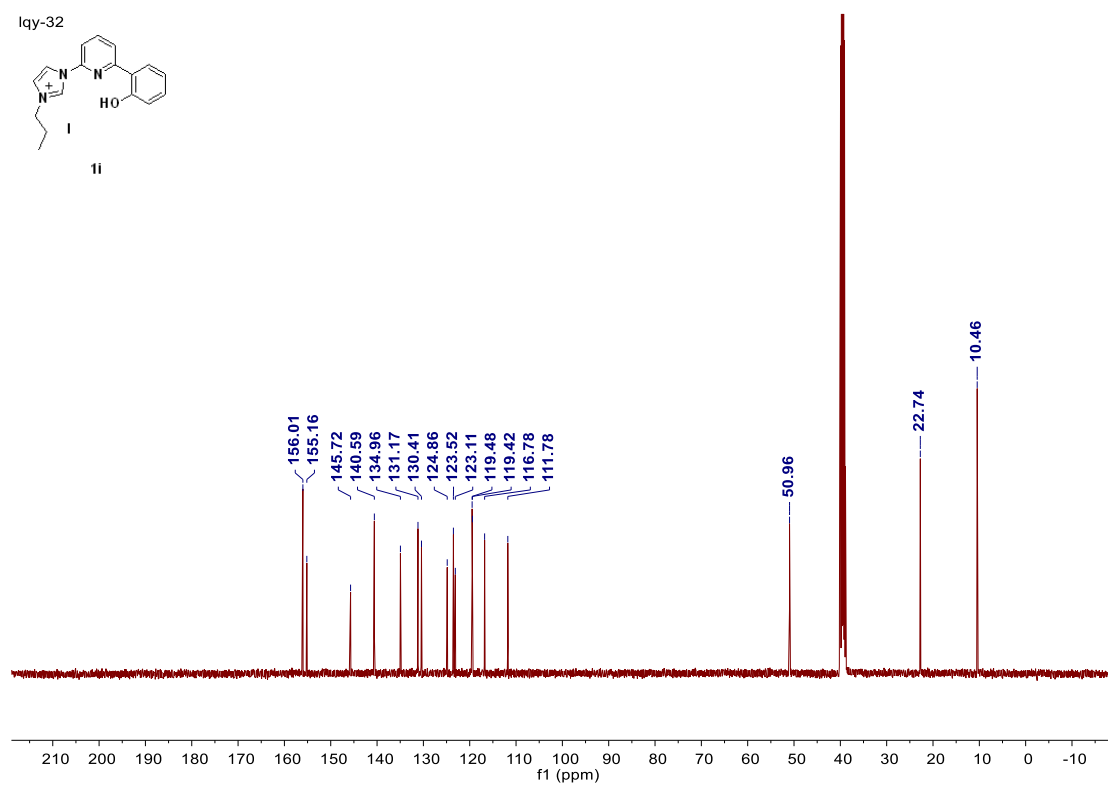

**Figure S18.** <sup>13</sup>C NMR spectra of organocatalyst **1i**.



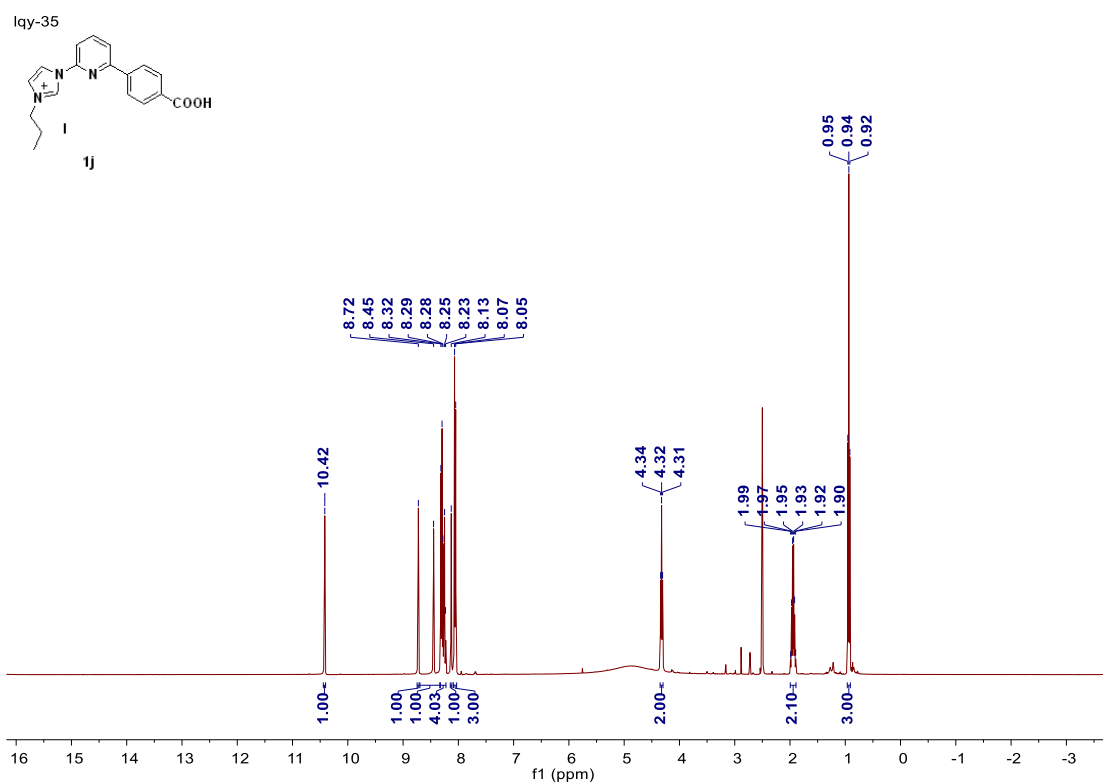

**Figure S19.** <sup>1</sup>H NMR spectra of organocatalyst **1j**.

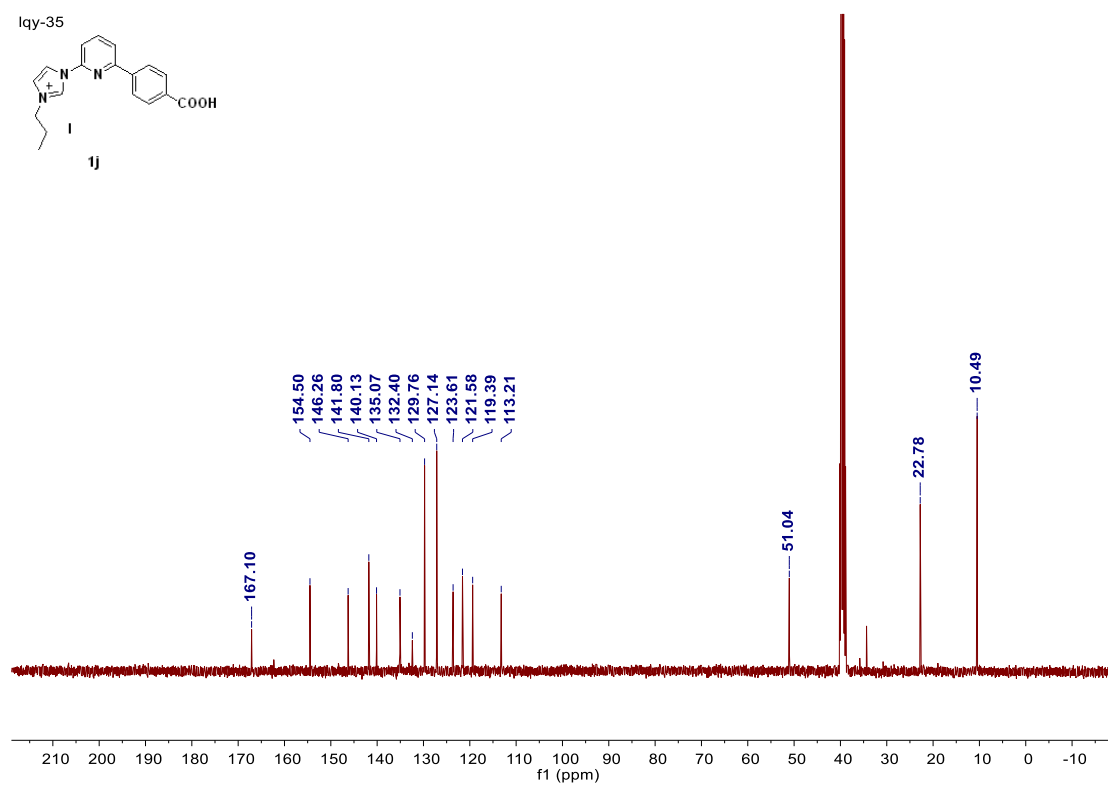

**Figure S20.** <sup>13</sup>C NMR spectra of organocatalyst **1j**.



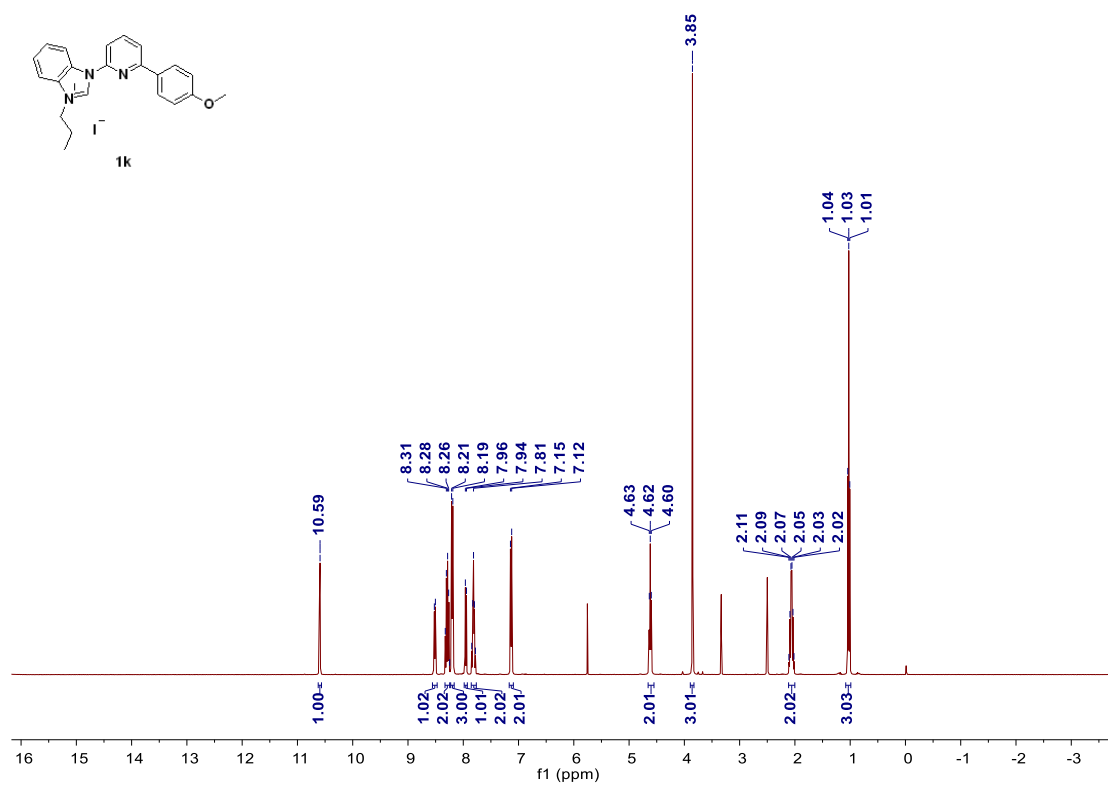

**Figure S21.**  $^1\text{H}$  NMR spectra of organocatalyst **1k**.

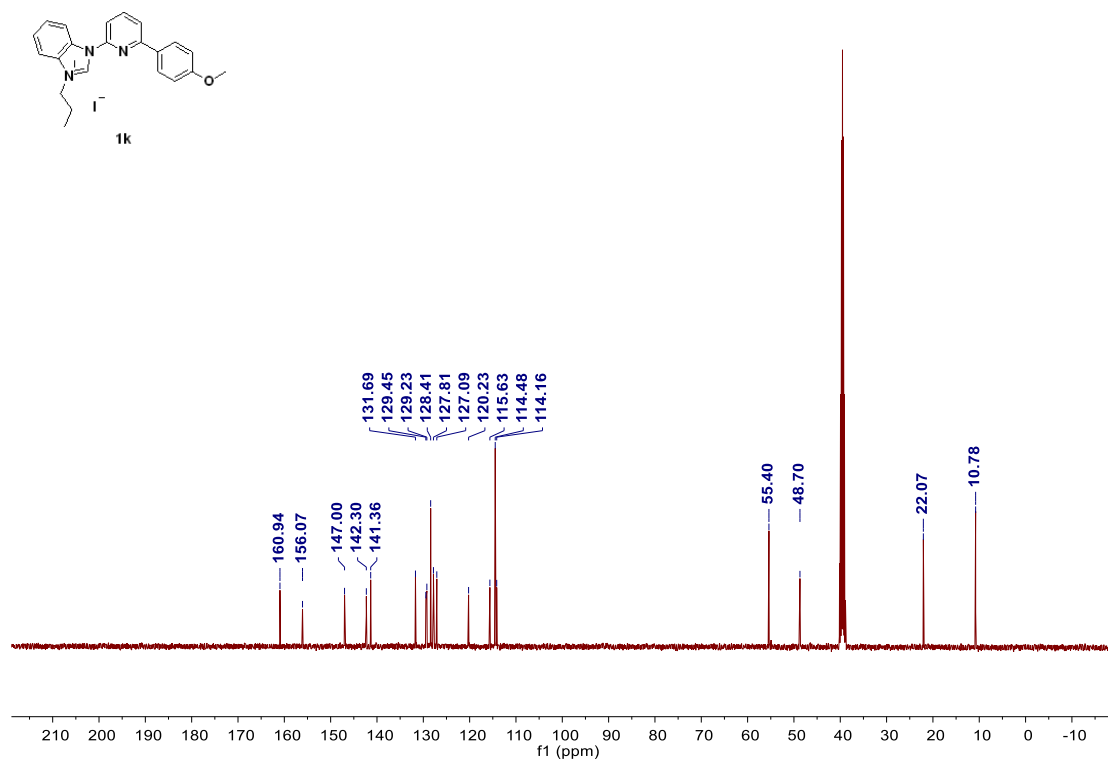

**Figure S22.**  $^{13}\text{C}$  NMR spectra of organocatalyst **1k**.



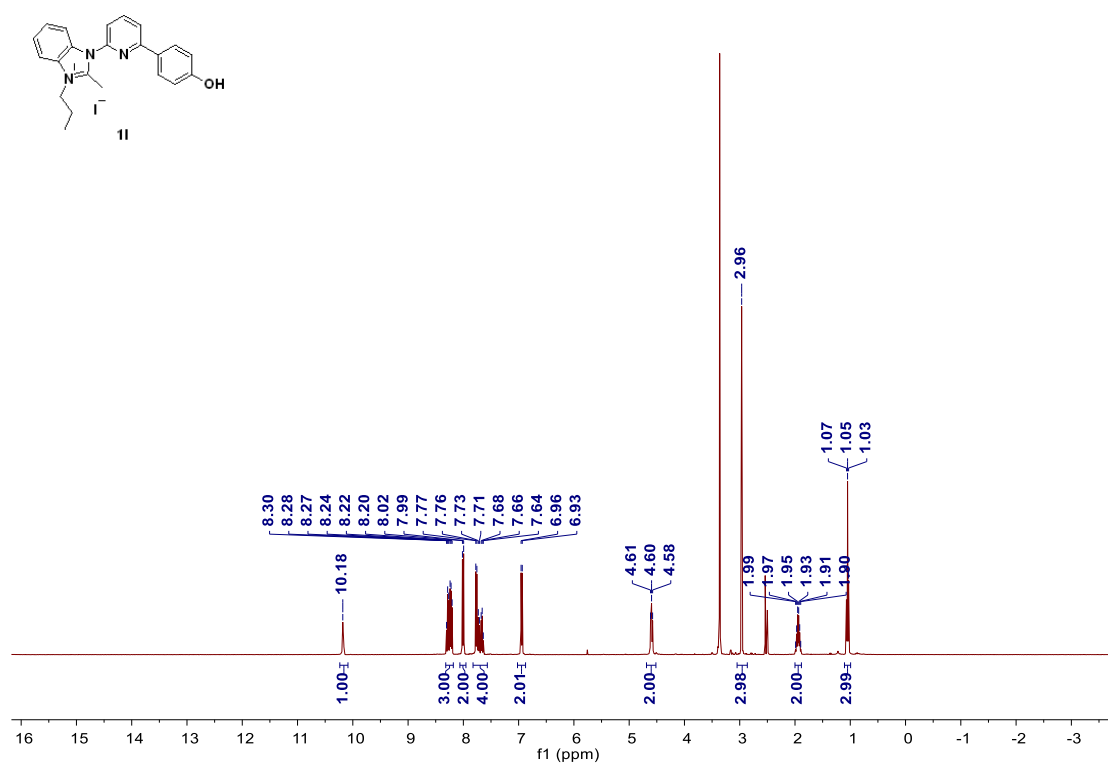

**Figure S23.** <sup>1</sup>H NMR spectra of organocatalyst **11**.

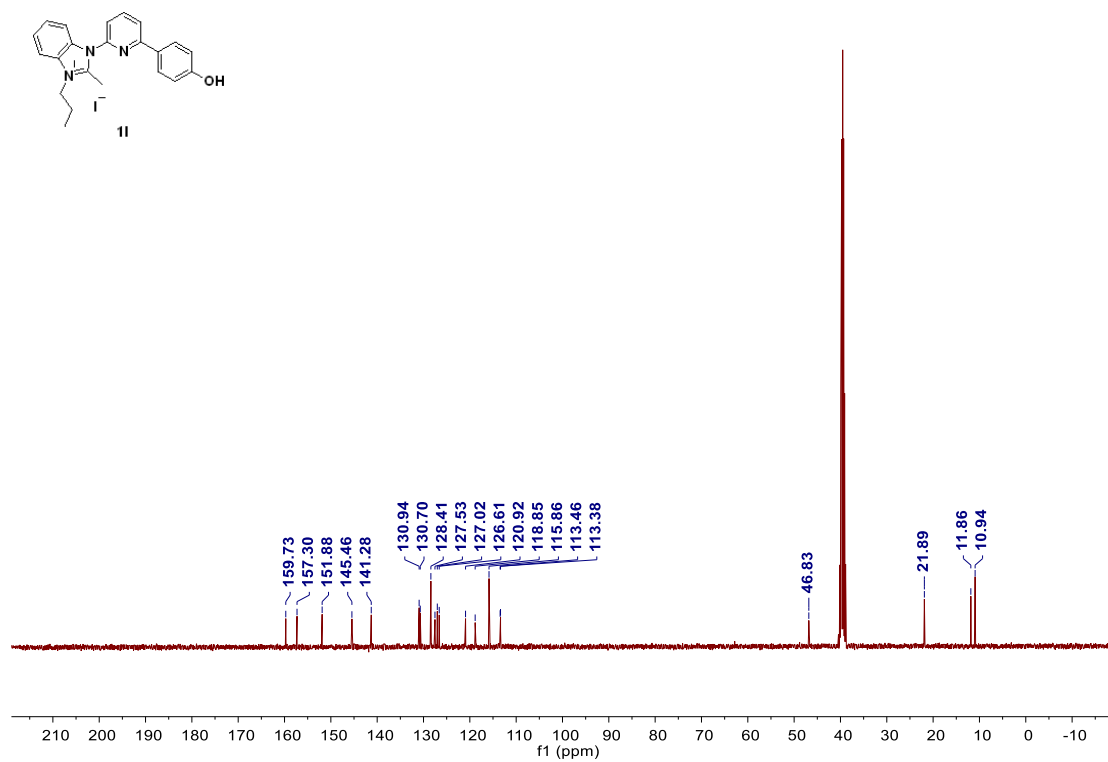

**Figure S24.** <sup>13</sup>C NMR spectra of organocatalyst **11**.



### 3. NMR Spectra for the Cycloaddition Products

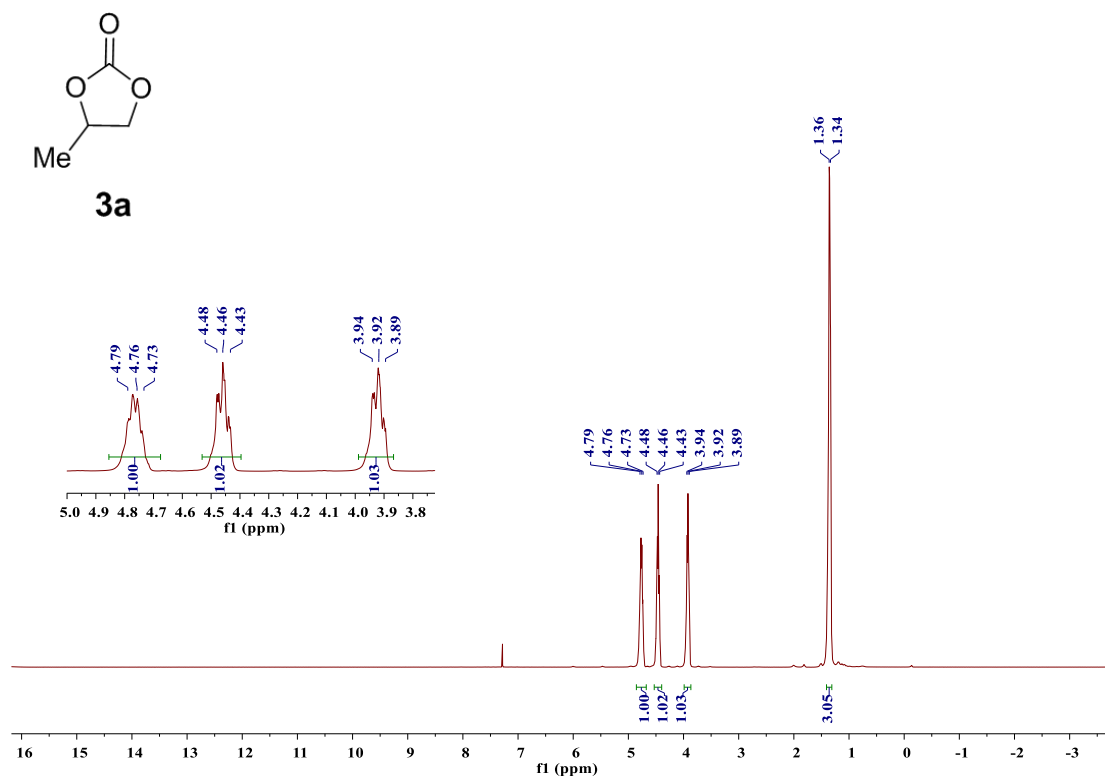

**Figure S25.** <sup>1</sup>H NMR spectra of cyclic carbonate **3a**.

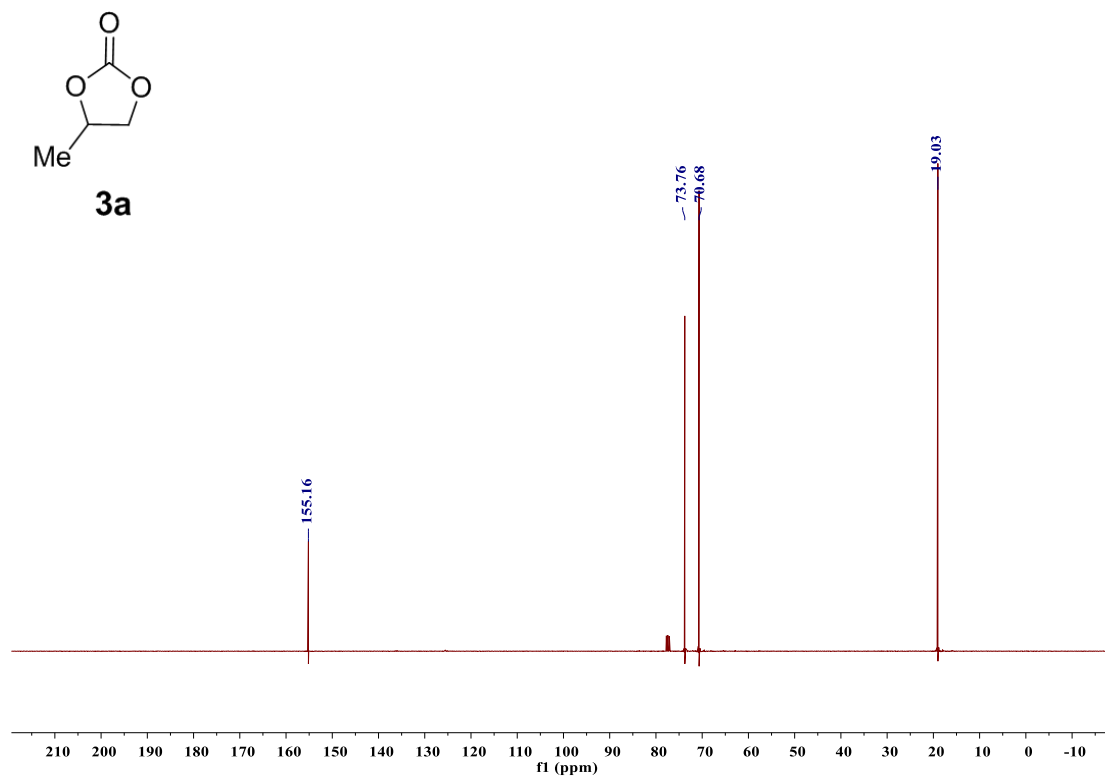

**Figure S26.** <sup>13</sup>C NMR spectra of cyclic carbonate **3a**.



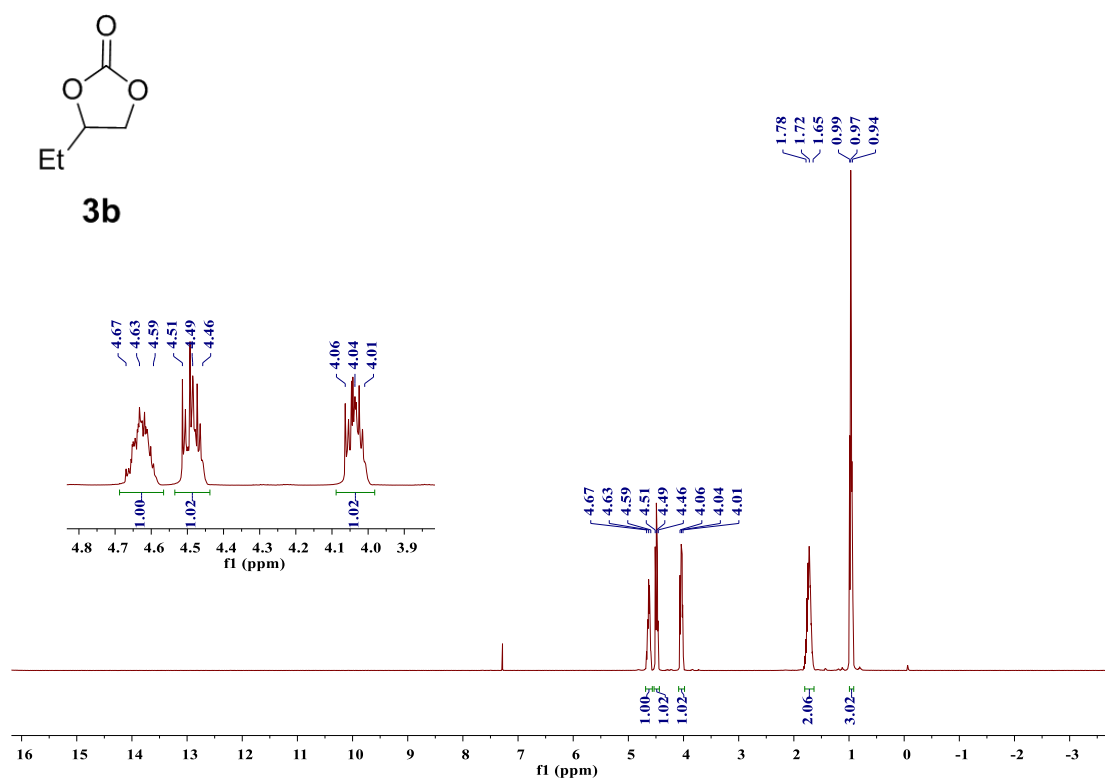

**Figure S27.**  $^1\text{H}$  NMR spectra of cyclic carbonate **3b**.

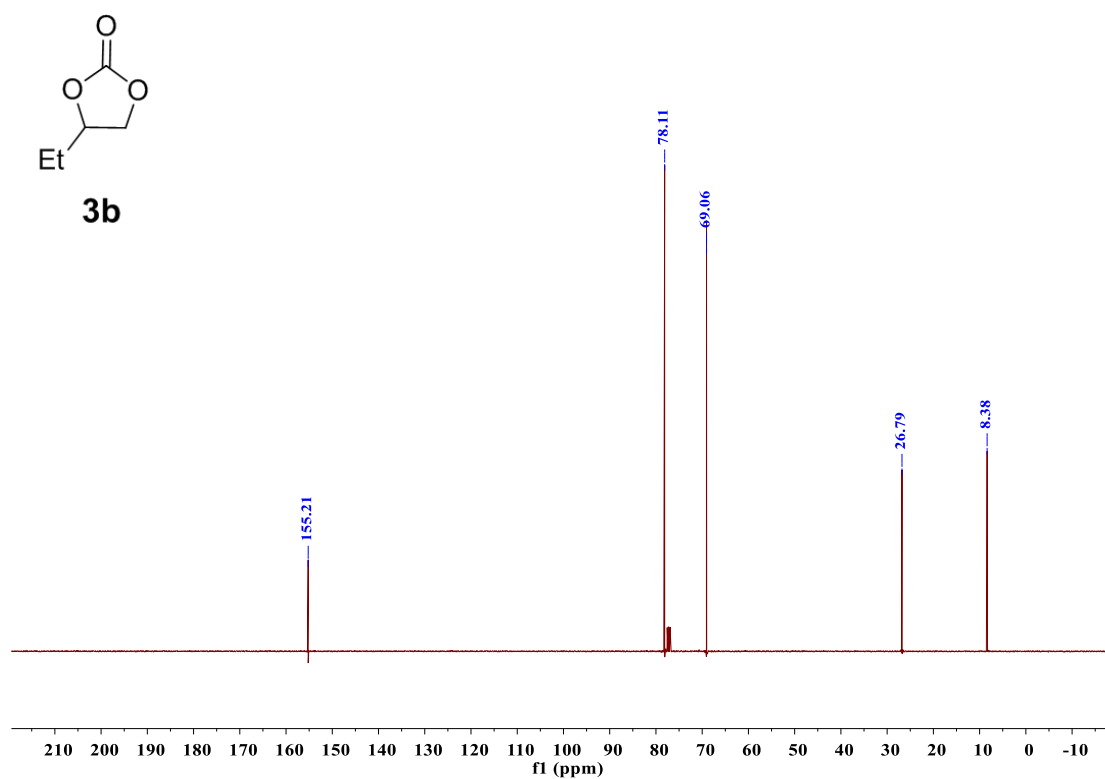

**Figure S28.**  $^{13}\text{C}$  NMR spectra of cyclic carbonate **3b**.



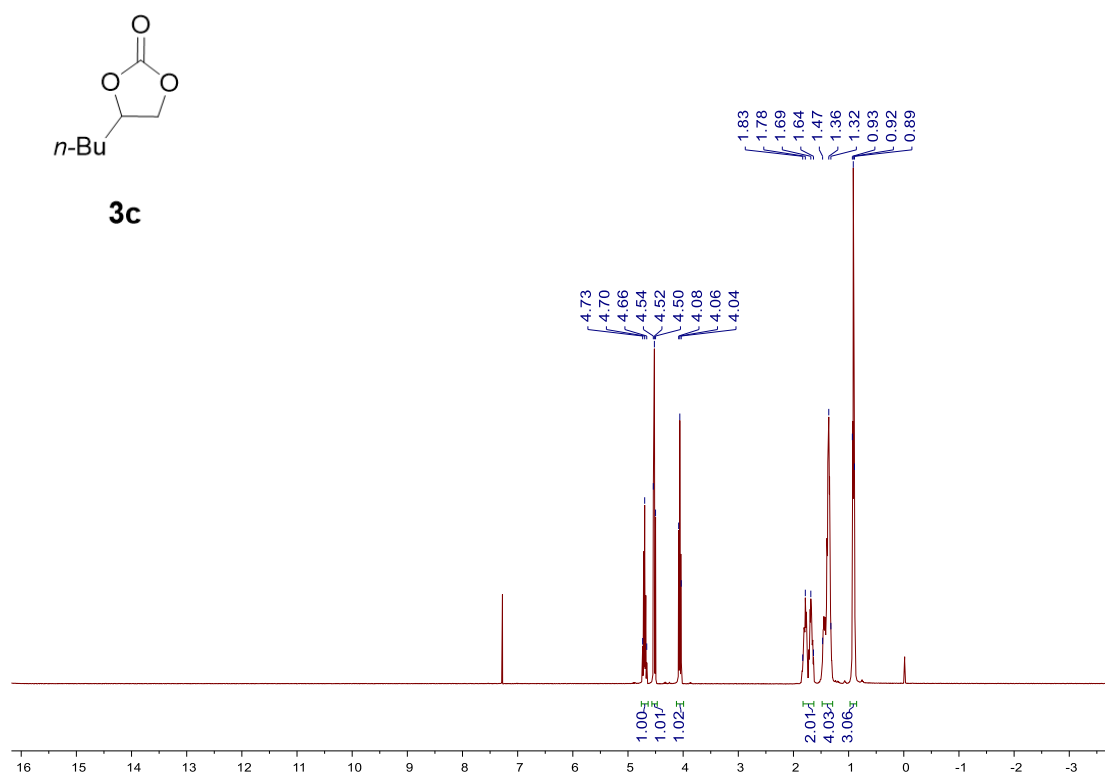

**Figure S29.** <sup>1</sup>H NMR spectra of cyclic carbonate **3c**.

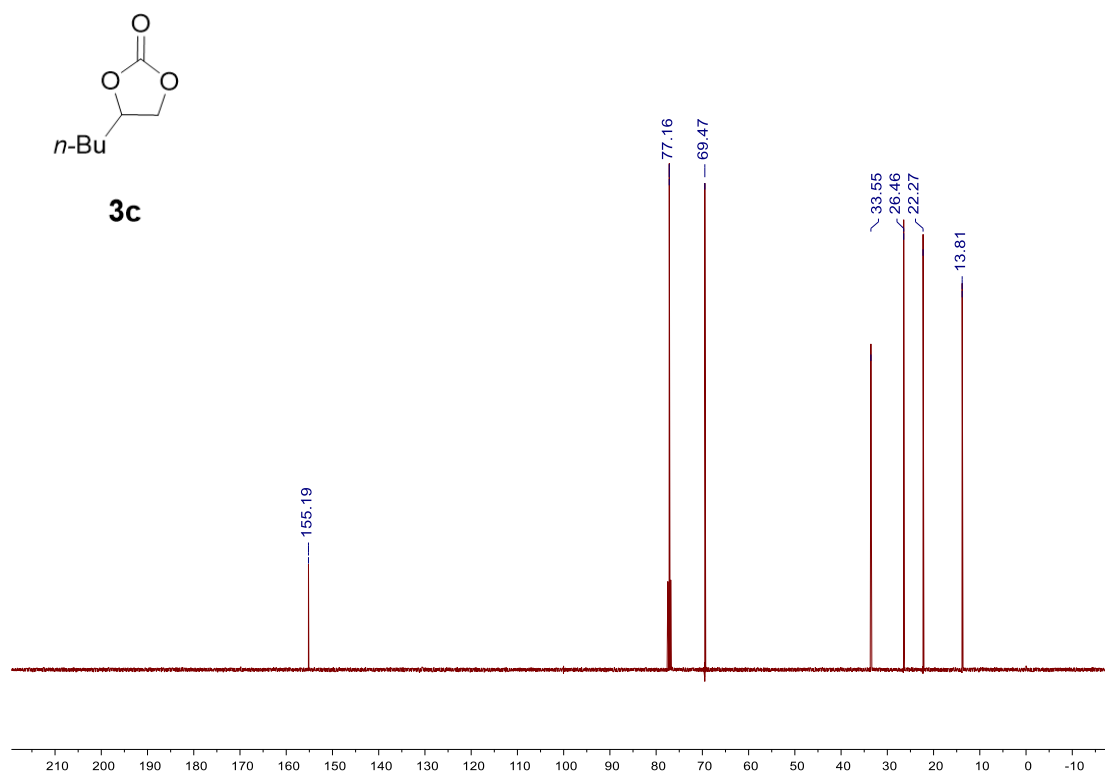

**Figure S30.** <sup>13</sup>C NMR spectra of cyclic carbonate **3c**.







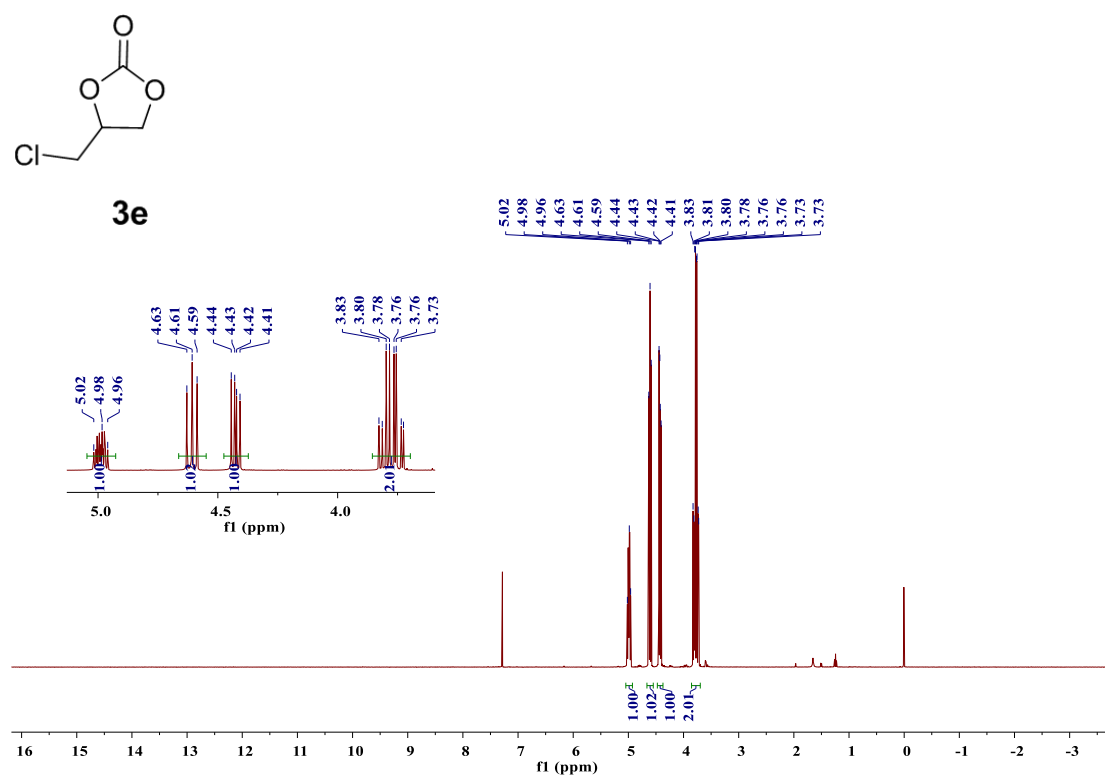

**Figure S33.** <sup>1</sup>H NMR spectra of cyclic carbonate **3e**.

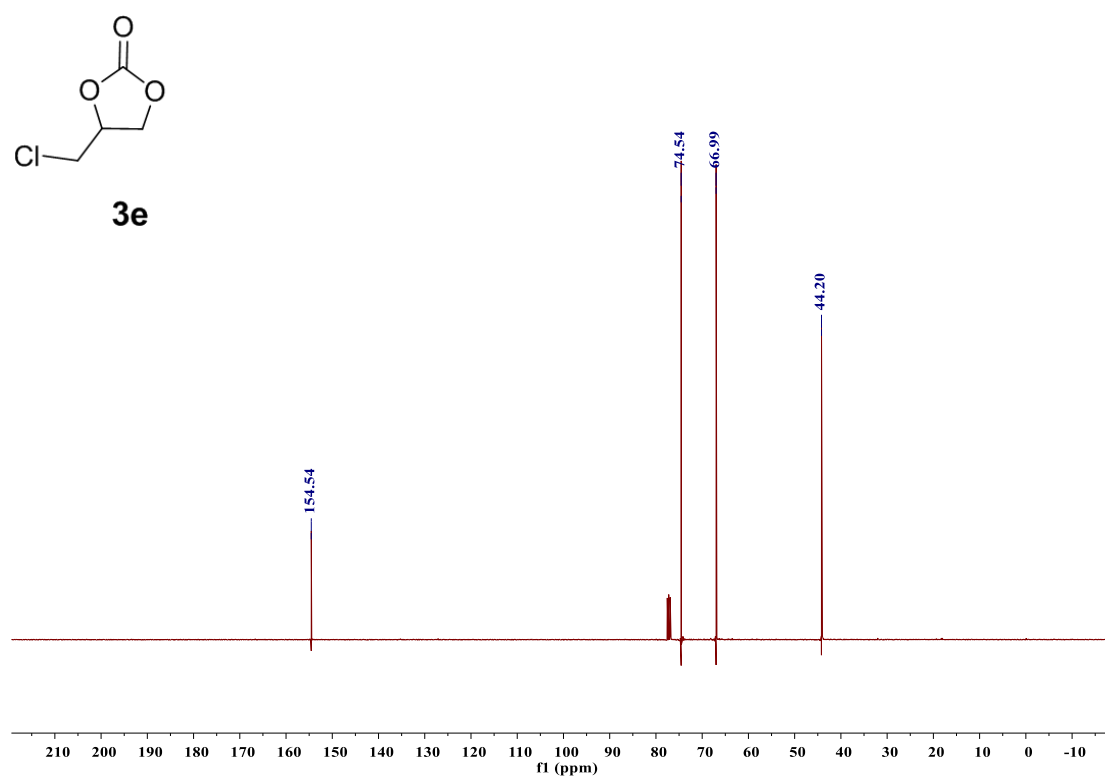

**Figure S34.** <sup>13</sup>C NMR spectra of cyclic carbonate **3e**.



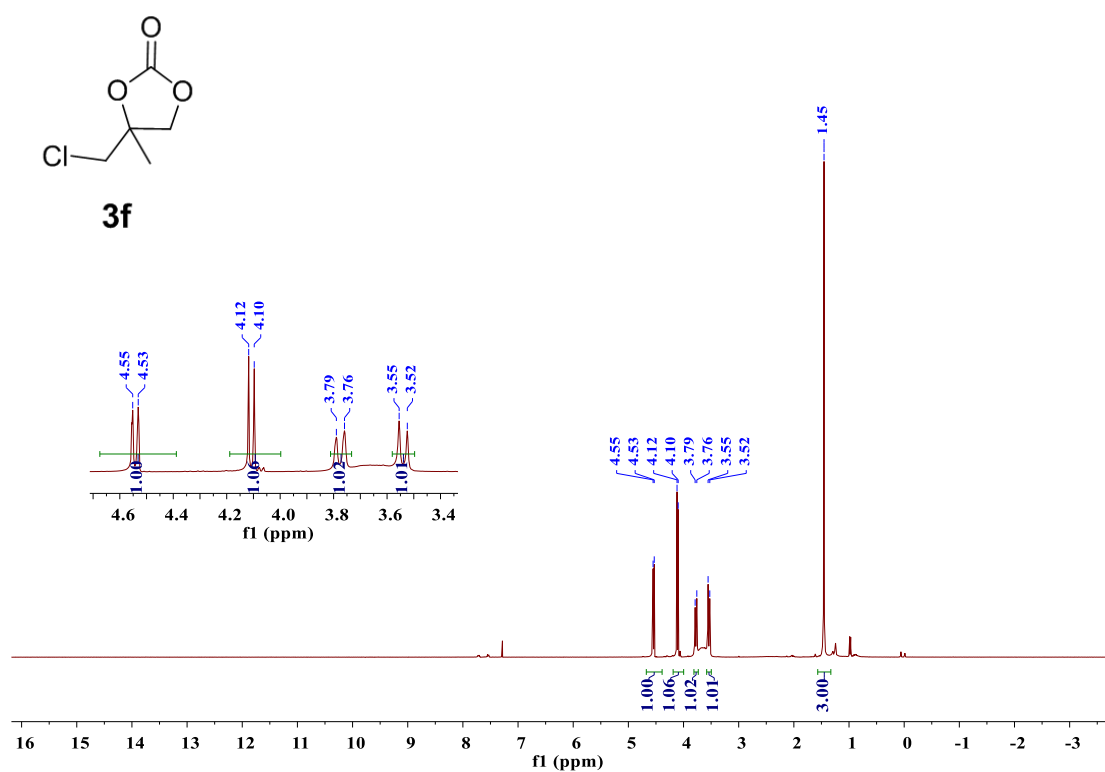

**Figure S35.** <sup>1</sup>H NMR spectra of cyclic carbonate **3f**.

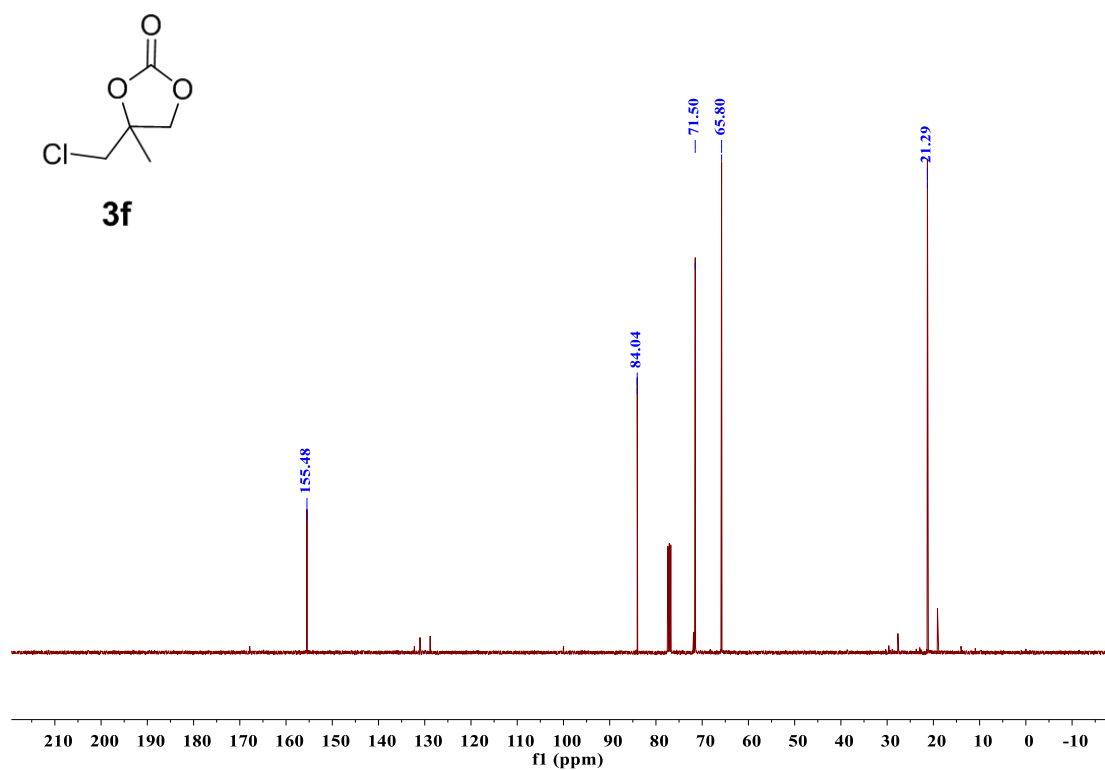

**Figure S36.** <sup>13</sup>C NMR spectra of cyclic carbonate **3f**.



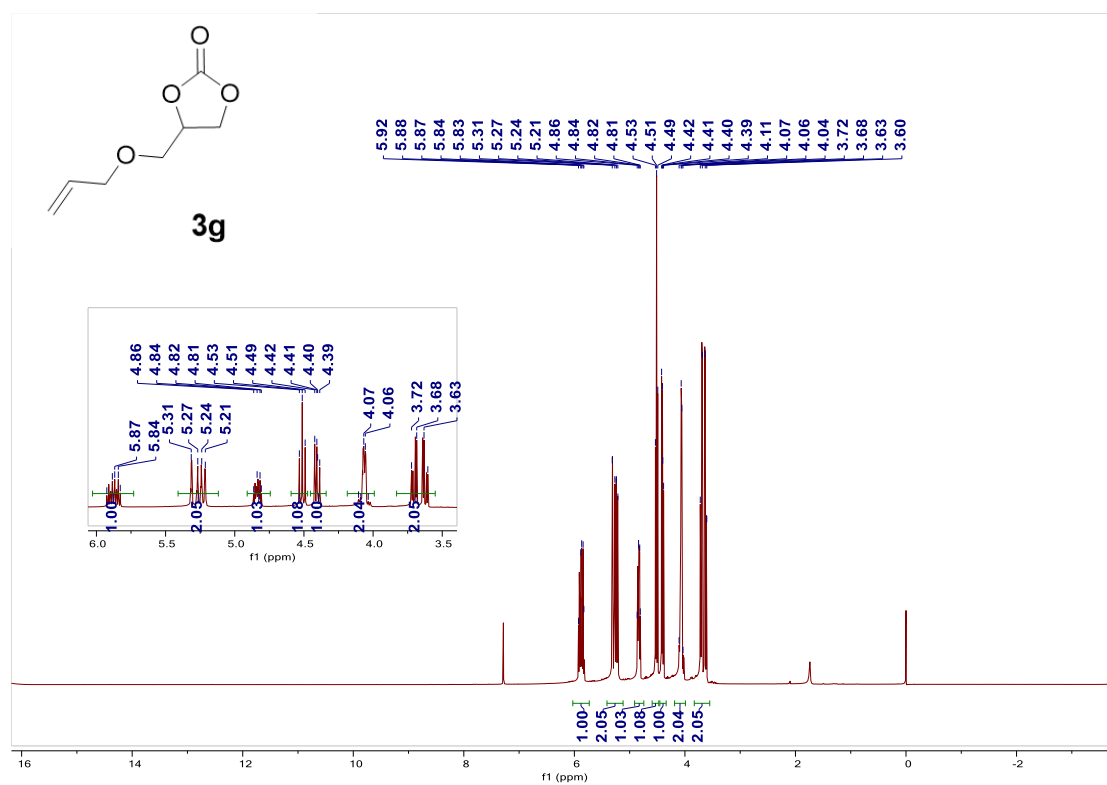

**Figure S37.** <sup>1</sup>H NMR spectra of cyclic carbonate **3g**.

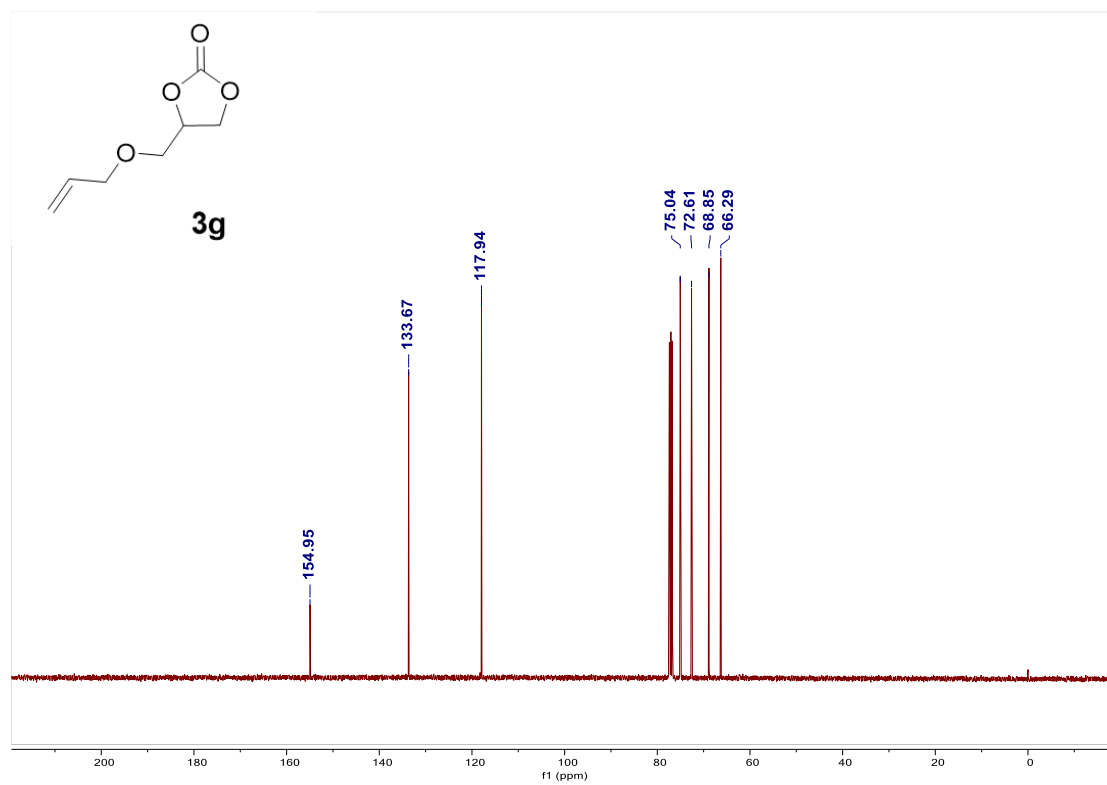

**Figure S38.** <sup>13</sup>C NMR spectra of cyclic carbonate **3g**.



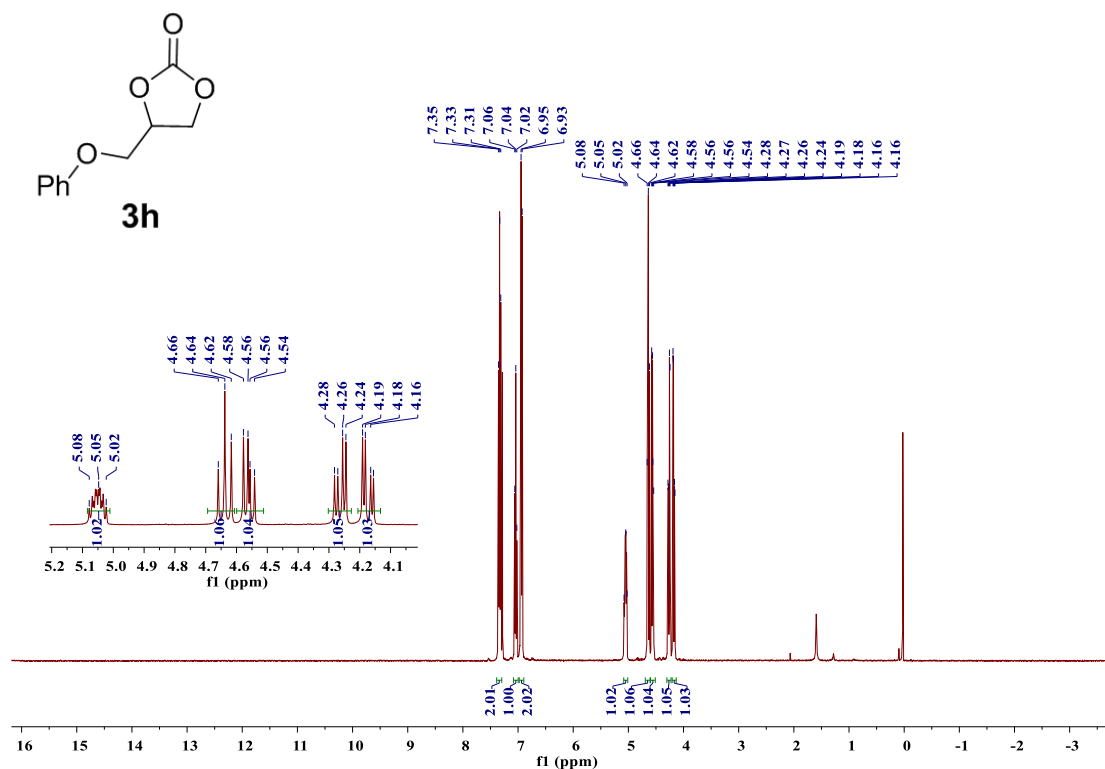

**Figure S39.**  $^1\text{H}$  NMR spectra of cyclic carbonate **3h**.

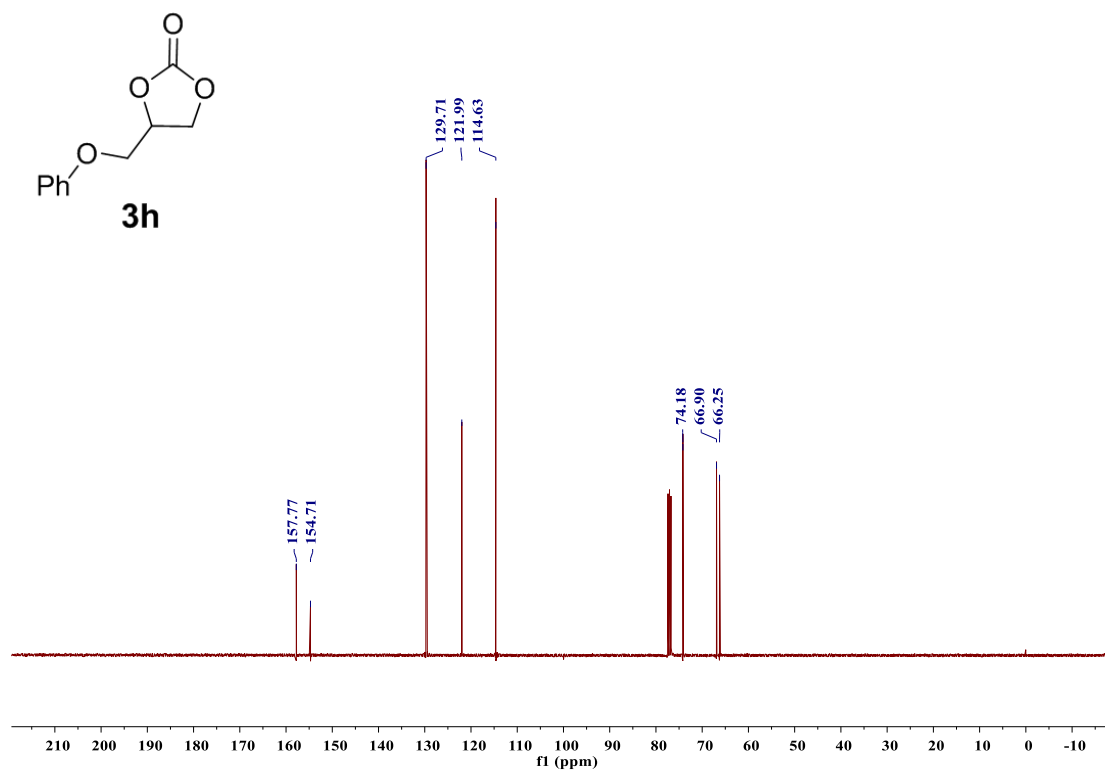

**Figure S40.**  $^{13}\text{C}$  NMR spectra of cyclic carbonate **3h**.



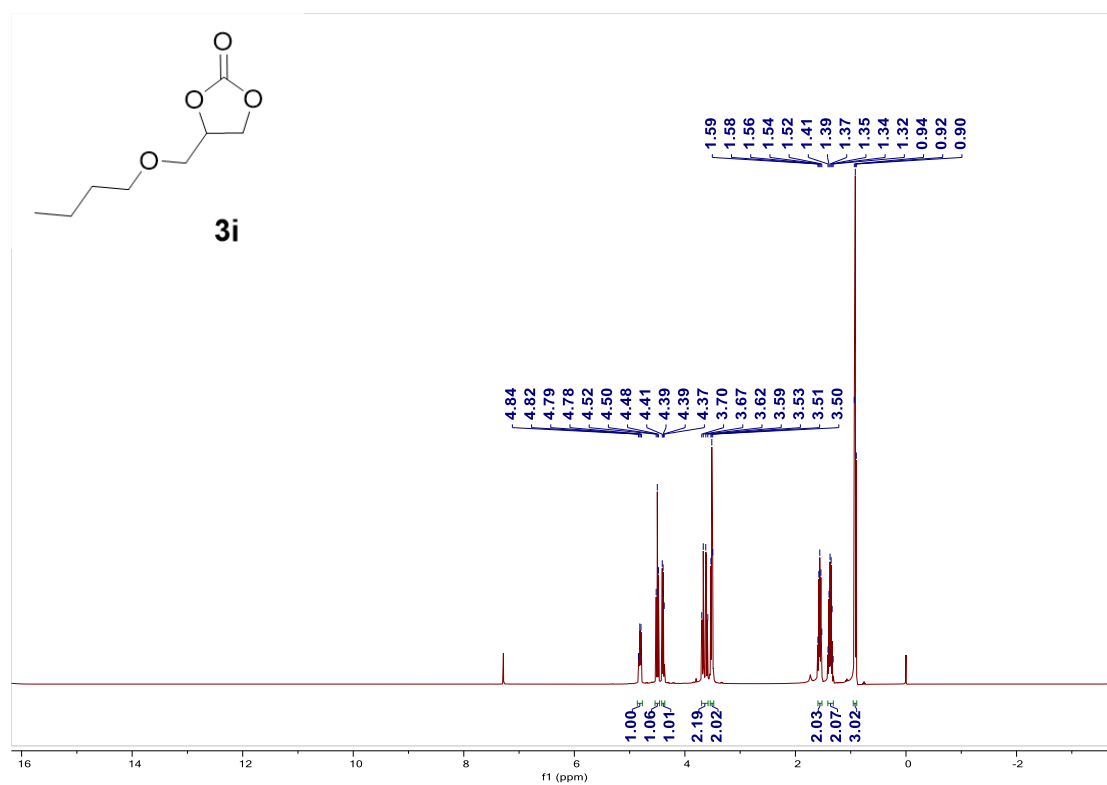

**Figure S41.** <sup>1</sup>H NMR spectra of cyclic carbonate **3i**.

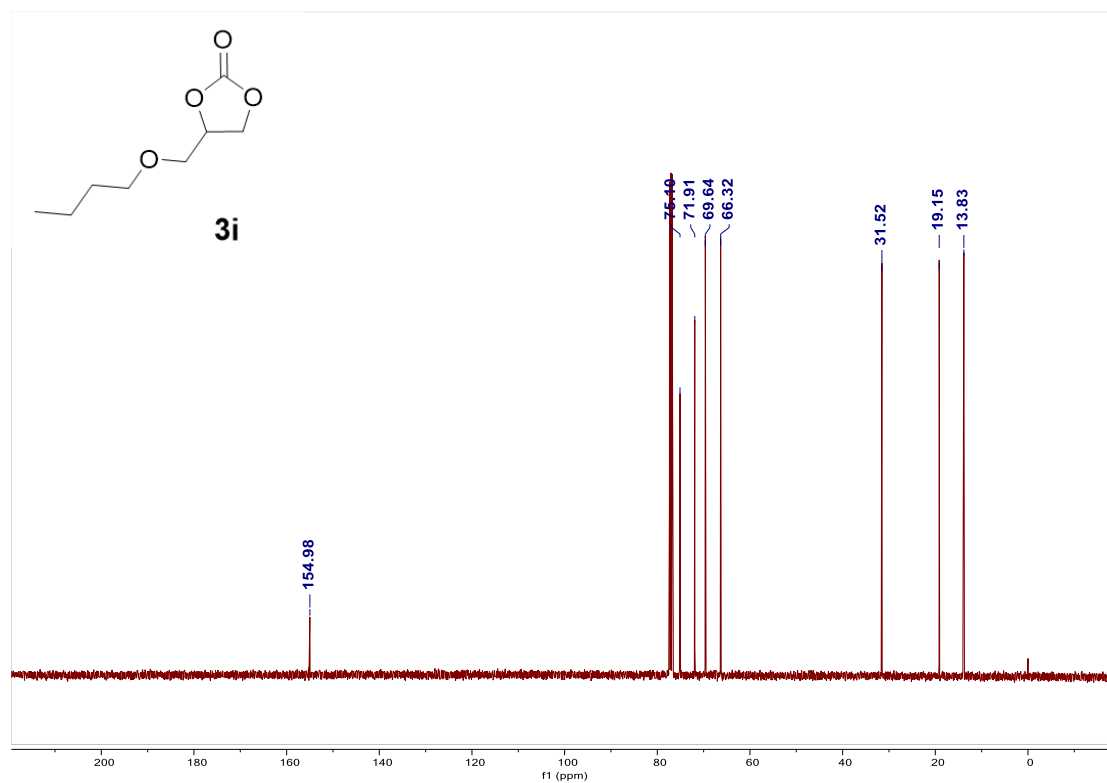

**Figure S42.** <sup>13</sup>C NMR spectra of cyclic carbonate **3i**.



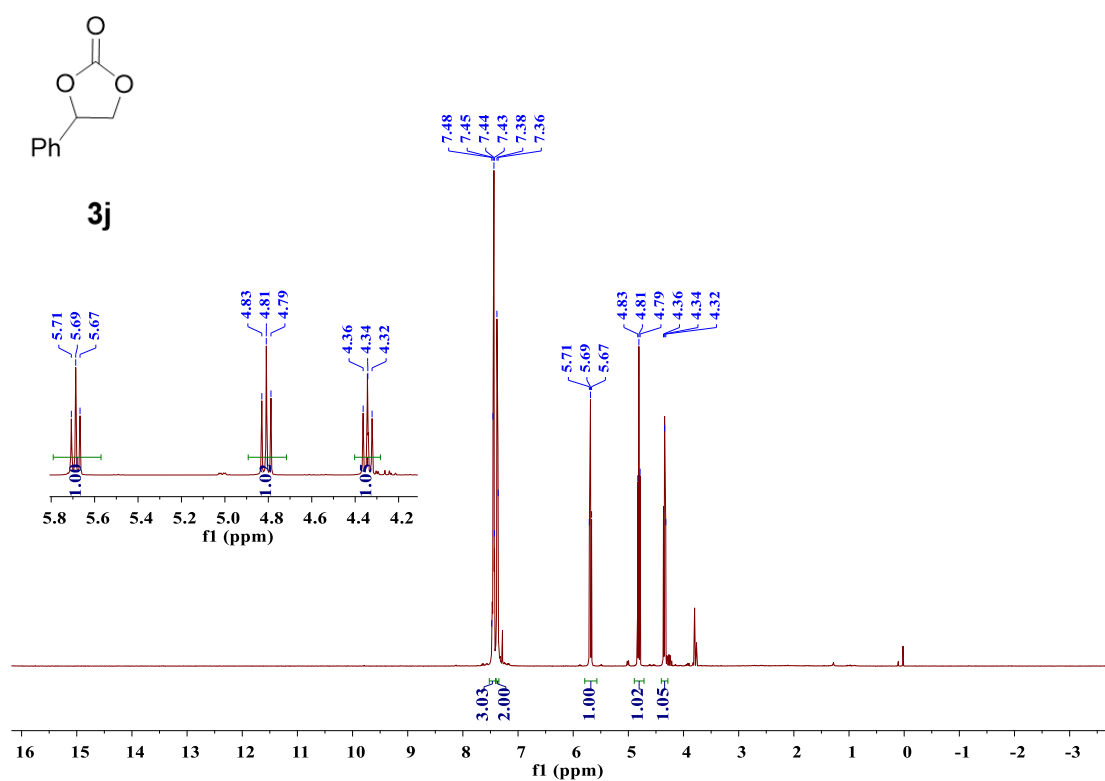

**Figure S43.** <sup>1</sup>H NMR spectra of cyclic carbonate **3j**.

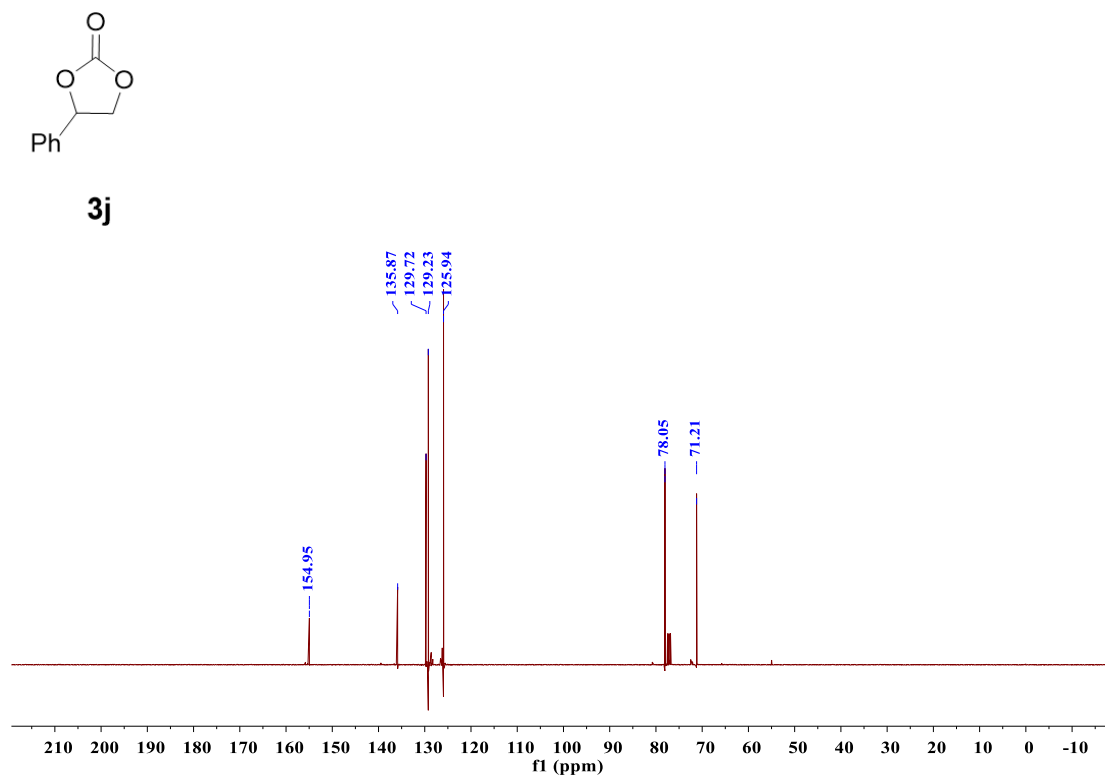

**Figure S44.** <sup>13</sup>C NMR spectra of cyclic carbonate **3j**.



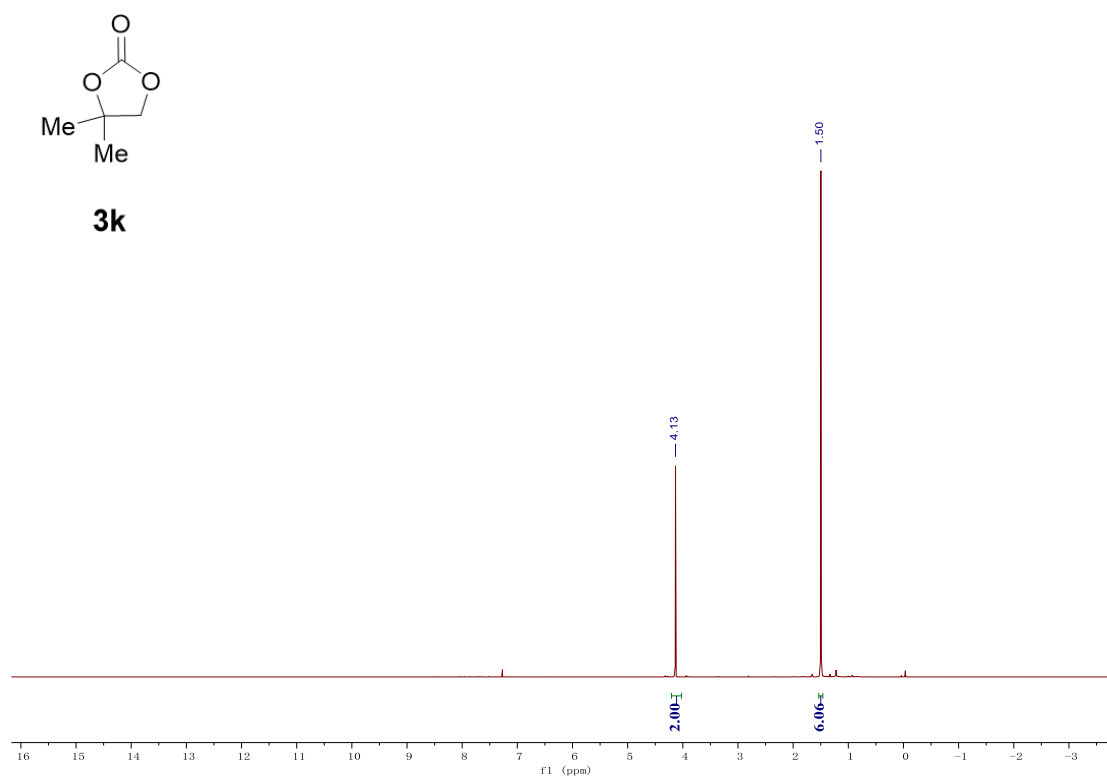

**Figure S45.**  $^1\text{H}$  NMR spectra of cyclic carbonate **3k**.

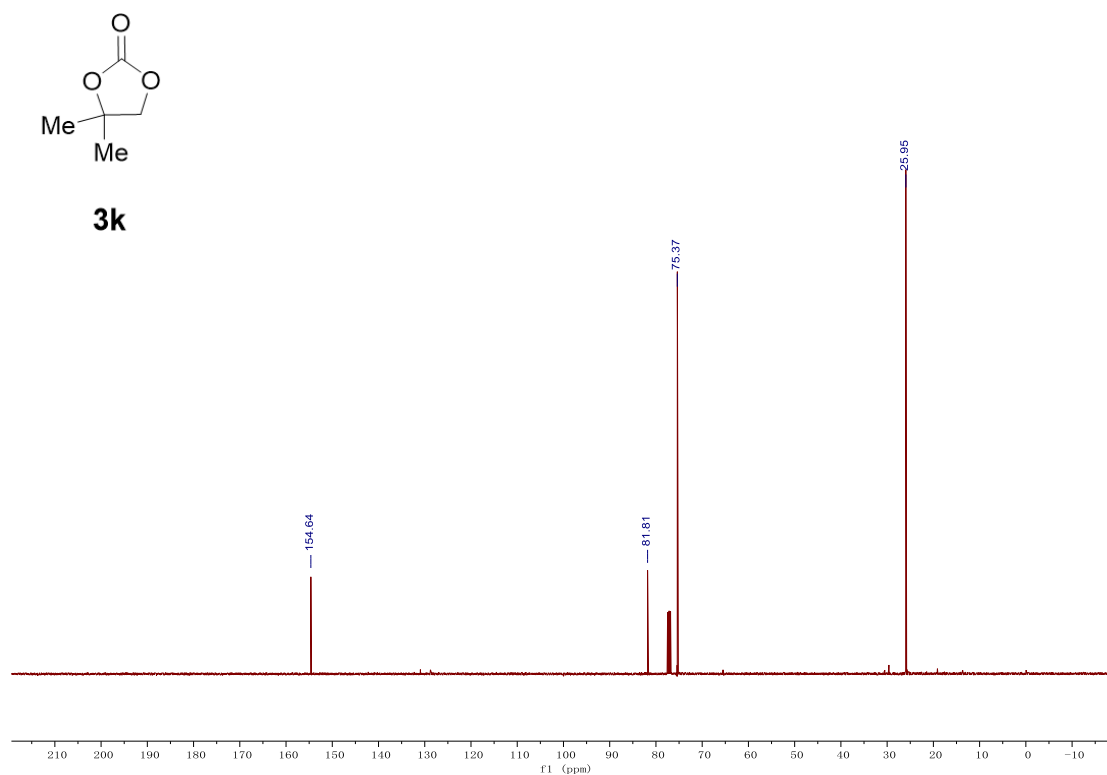

**Figure S46.**  $^{13}\text{C}$  NMR spectra of cyclic carbonate **3k**.



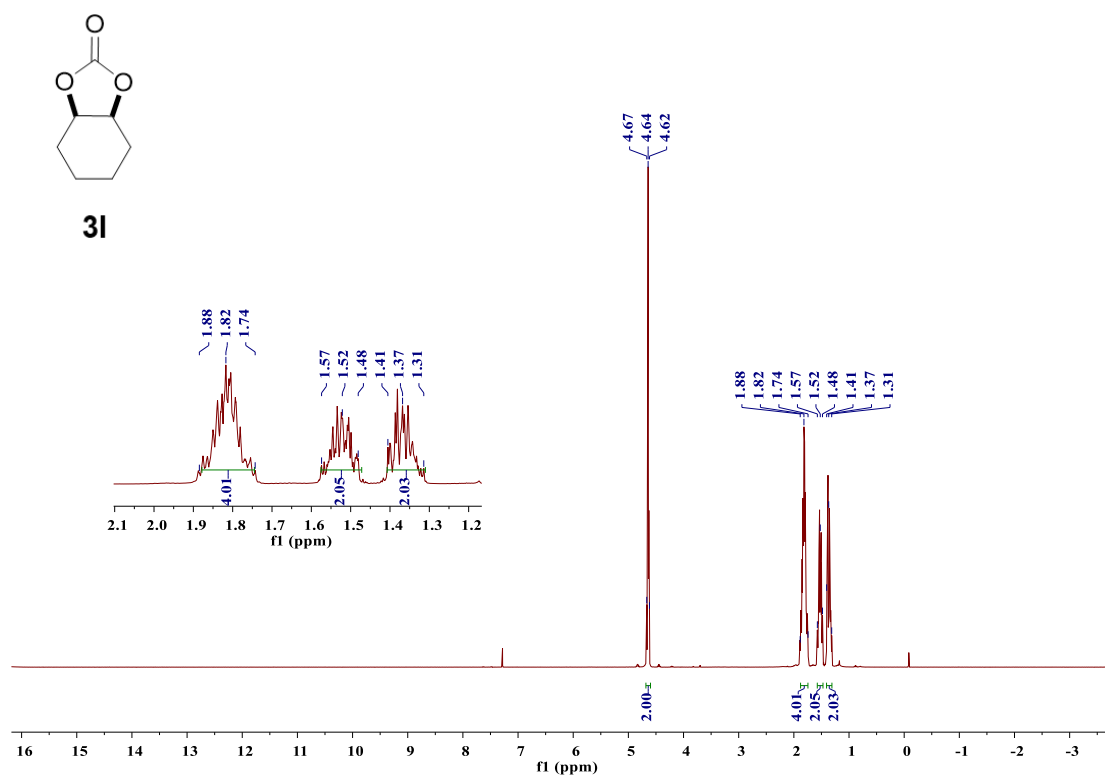

**Figure S47.** <sup>1</sup>H NMR spectra of cyclic carbonate **3l**.

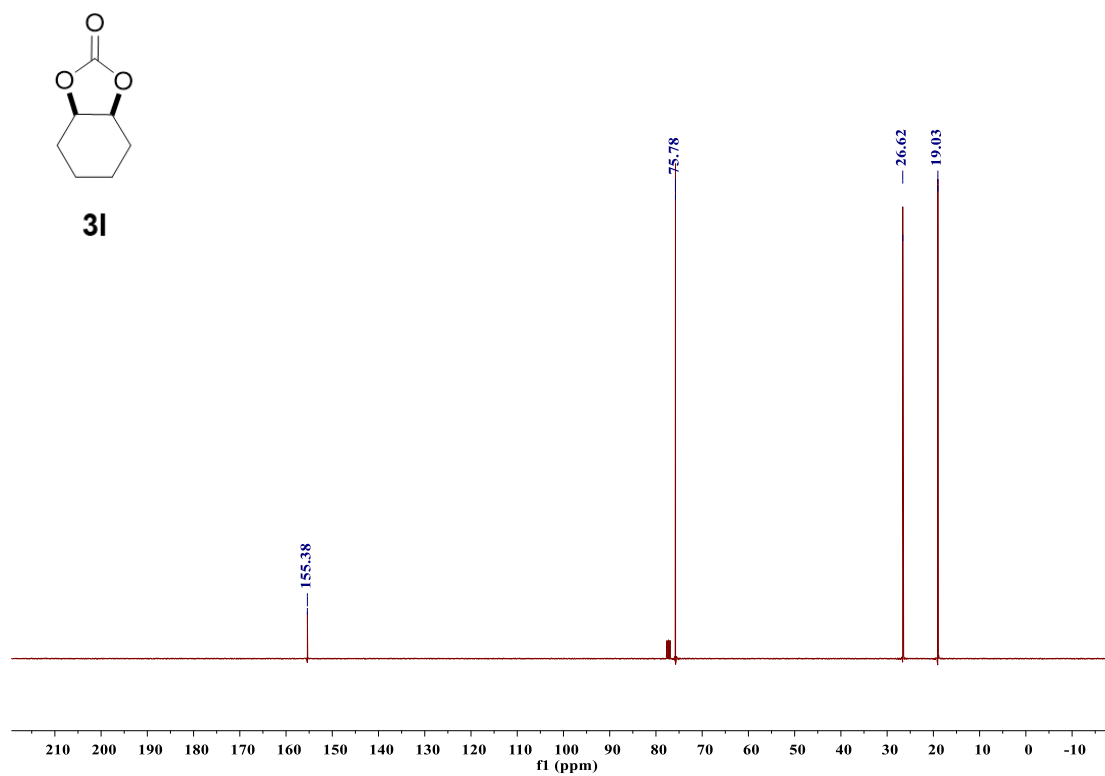

**Figure S48.** <sup>13</sup>C NMR spectra of cyclic carbonate **3l**.



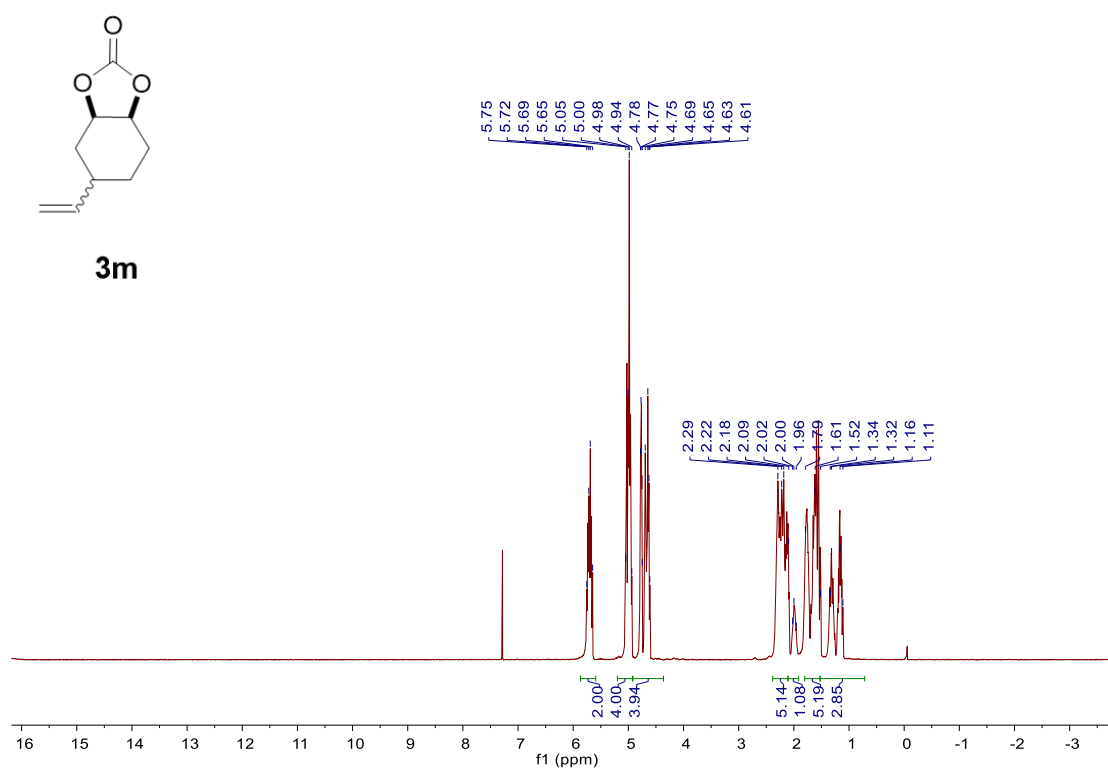

**Figure S49.** <sup>1</sup>H NMR spectra of cyclic carbonate **3m**.

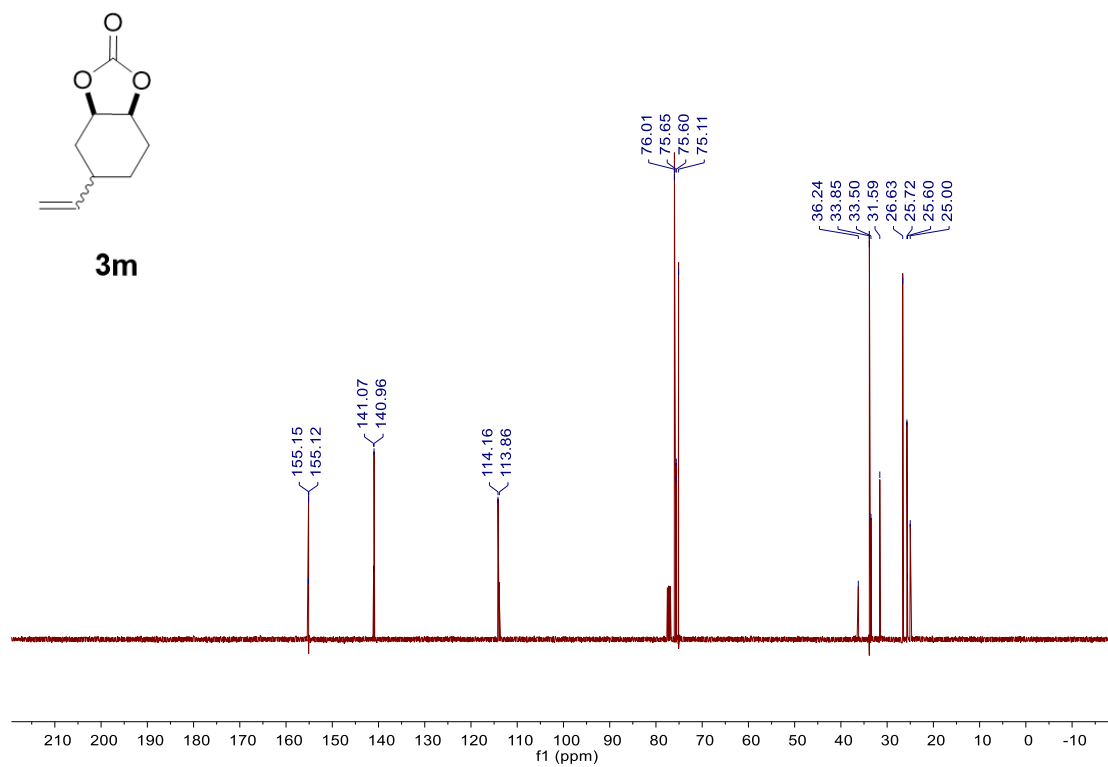

**Figure S50.** <sup>13</sup>C NMR spectra of cyclic carbonate **3m**.



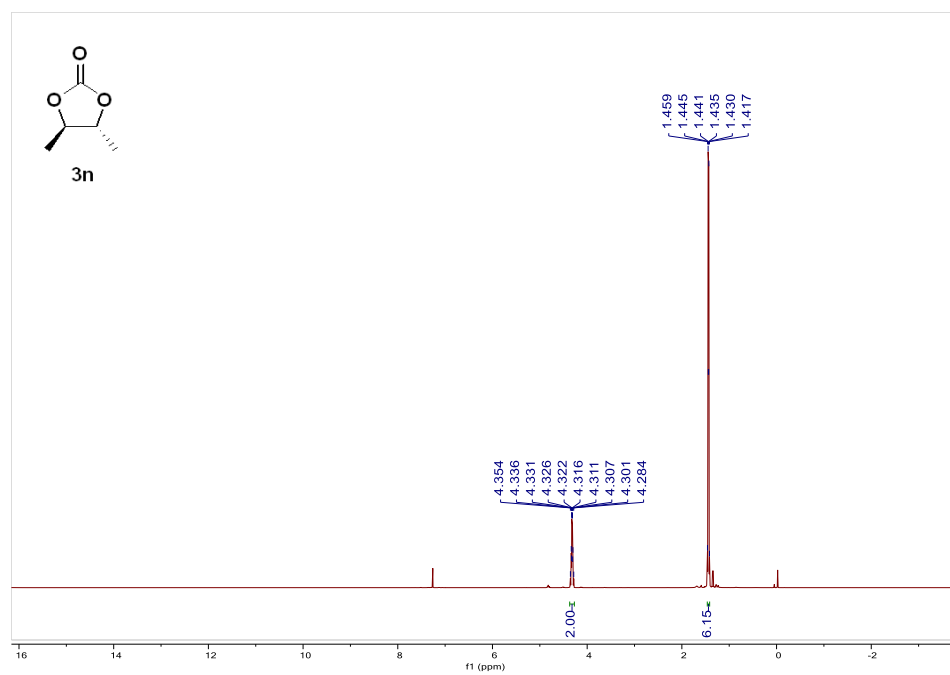

**Figure S51.**  $^1\text{H}$  NMR spectra of cyclic carbonate **3n**.

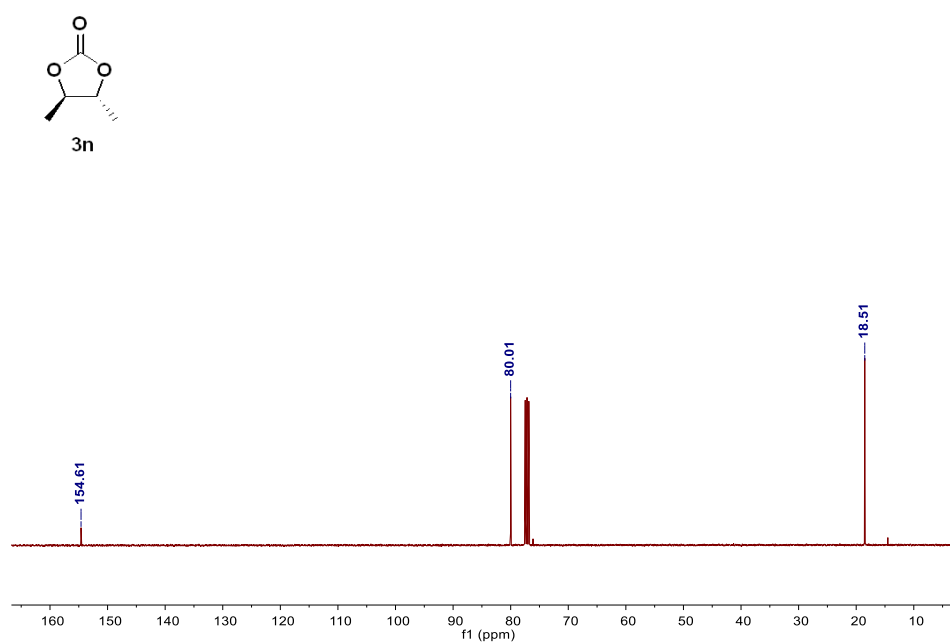

**Figure S52.**  $^{13}\text{C}$  NMR spectra of cyclic carbonate **3n**.



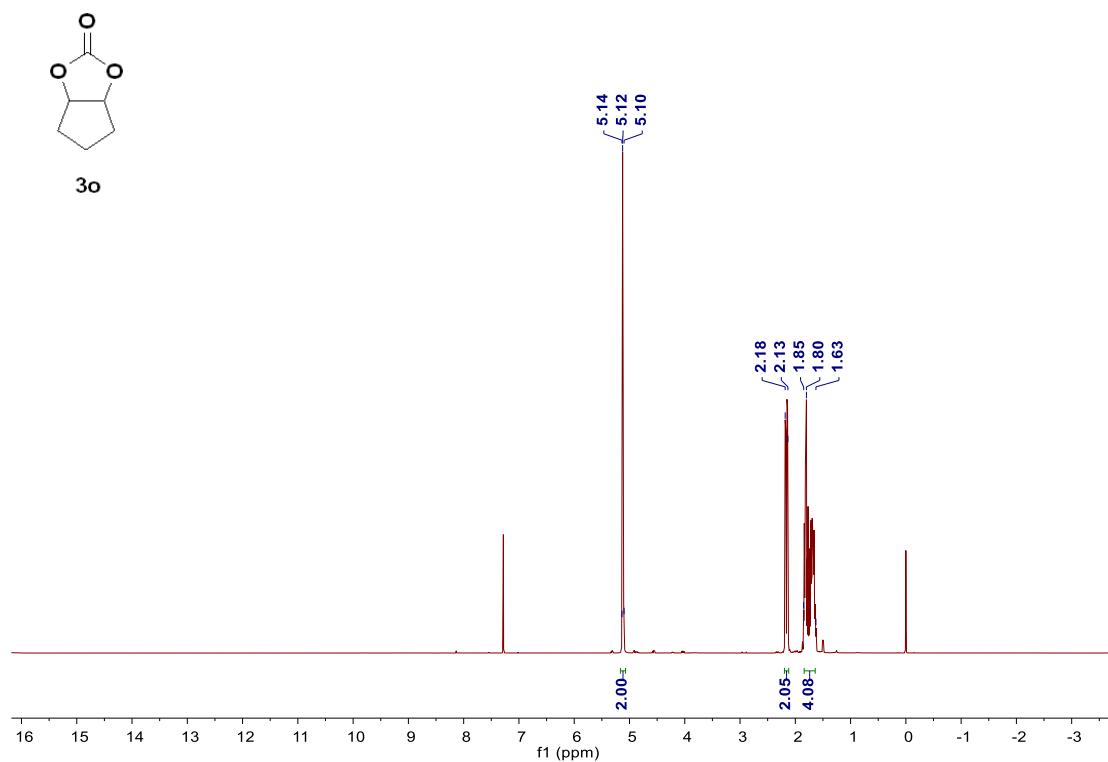

**Figure S53.** <sup>1</sup>H NMR spectra of cyclic carbonate **3o**.

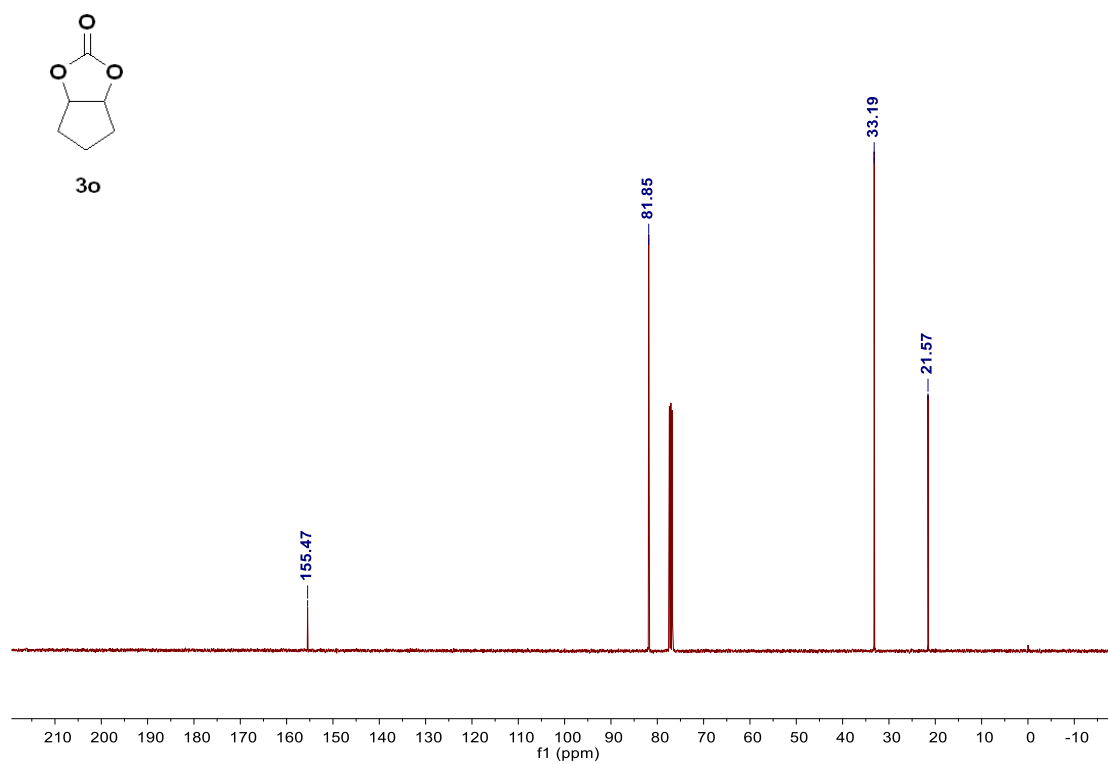

**Figure S54.** <sup>13</sup>C NMR spectra of cyclic carbonate **3o**.



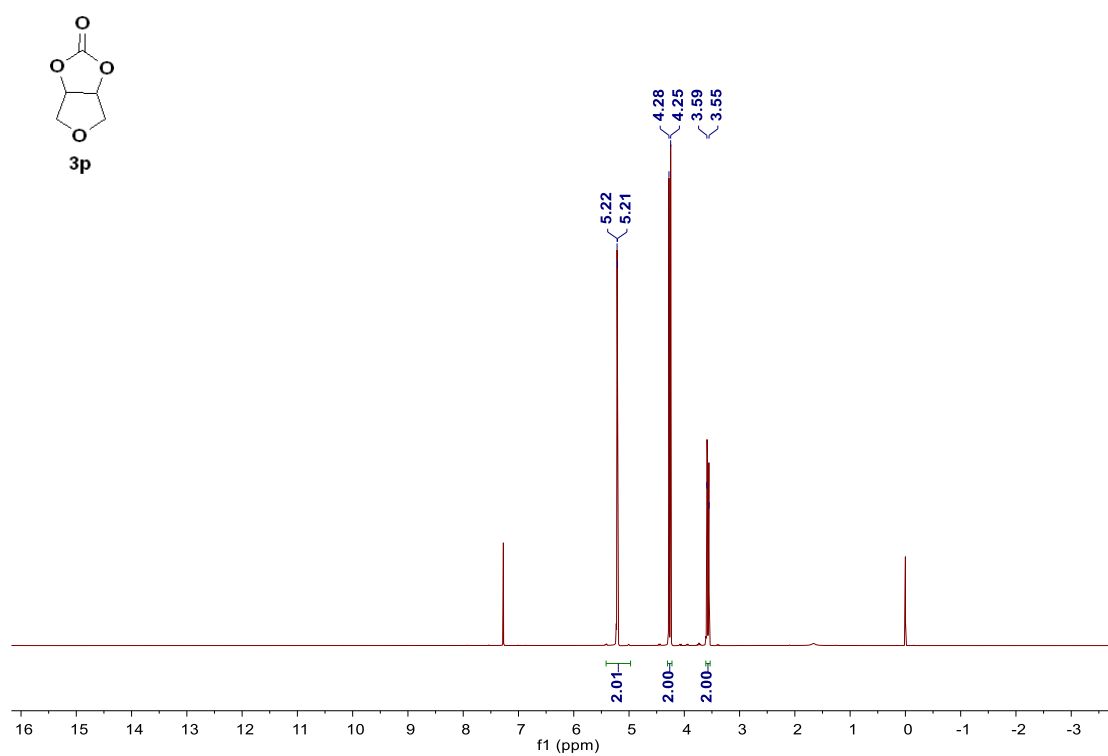

**Figure S55.** <sup>1</sup>H NMR spectra of cyclic carbonate **3p**.

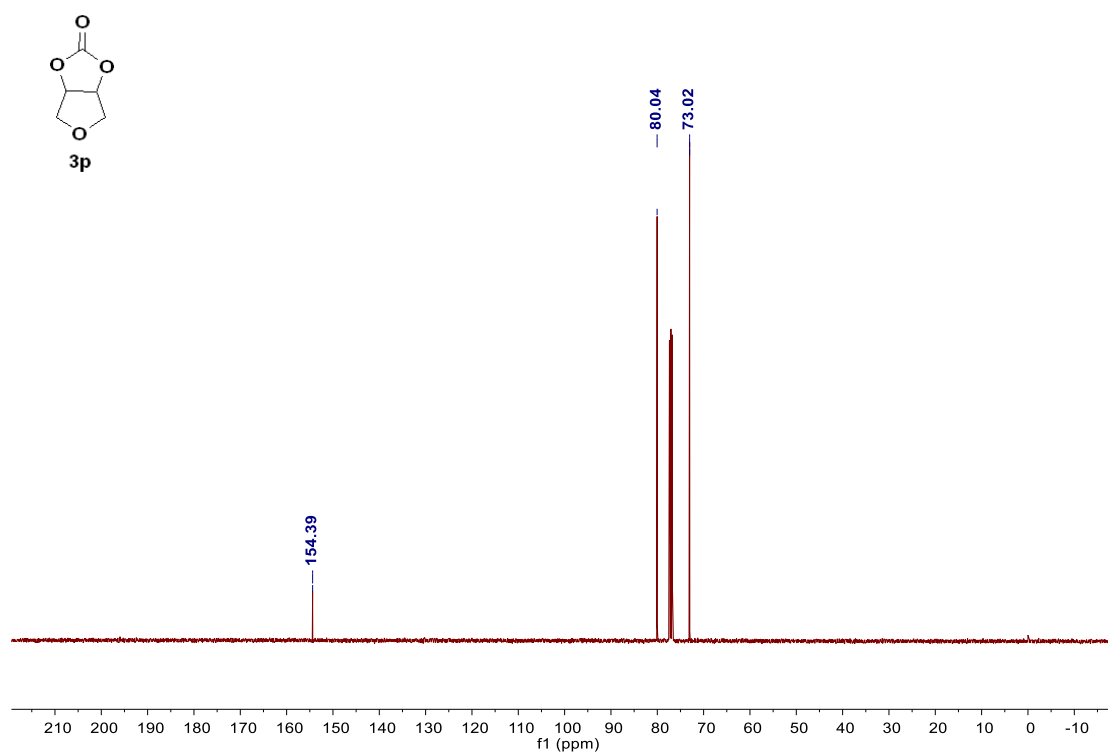

**Figure S56.** <sup>13</sup>C NMR spectra of cyclic carbonate **3p**.
